# Supplementary material
Source: PubMed Central journal article supplement (PMC29061)
Supplement: 1471-2105-1-1-s2.pdf [file 1471-2105-1-1-s2.pdf]

**EMP Pathway**

| Enzyme                                             | Rxn# | Gene               | Reaction                              | EC Number                  |
|----------------------------------------------------|------|--------------------|---------------------------------------|----------------------------|
| Glucokinase                                        | 1    | <i>glk</i>         | GLC + ATP -> G6P + ADP                | 2.7.1.2                    |
| Glucokinase                                        | 586  | <i>glk</i>         | bDGLC + ATP -> bDG6P + ADP            | 2.7.1.2                    |
| Phosphoglucose isomerase                           | 2    | <i>pgi</i>         | G6P <-> F6P                           | 5.3.1.9                    |
| Phosphoglucose isomerase                           | 3    | <i>pgi</i>         | bDG6P <-> G6P                         | 5.3.1.9                    |
| Phosphoglucose isomerase                           | 4    | <i>pgi</i>         | bDG6P <-> F6P                         | 5.3.1.9                    |
| Aldose 1-epimerase                                 | 585  | <i>galM</i>        | bDGLC <-> GLC                         | 5.1.3.3                    |
| Glucose-1-phosphatase                              | 587  | <i>agp</i>         | G1P -> GLC + PI                       | 3.1.3.10                   |
| Phosphofructokinase                                | 5    | <i>pfkA</i>        | F6P + ATP -> FDP + ADP                | 2.7.1.11                   |
| Phosphofructokinase B                              | 624  | <i>pfkB</i>        | F6P + ATP -> FDP + ADP                | 2.7.1.11                   |
| Fructose-1,6-bisphosphatase                        | 6    | <i>fbp</i>         | FDP -> F6P + PI                       | 3.1.3.11                   |
| Fructose-1,6-bisphosphatase aldolase               | 7    | <i>fba</i>         | FDP <-> T3P1 + T3P2                   | 4.1.2.13                   |
| Triosphosphate Isomerase                           | 8    | <i>tpiA</i>        | T3P1 <-> T3P2                         | 5.3.1.1                    |
| Methylglyoxal synthase                             |      | <i>mgsA</i>        | T3P2 -> MTHGXL + PI                   | 4.2.99.11                  |
| Glyceraldehyde-3-phosphate dehydrogenase-A complex | 9    | <i>gapA</i>        | T3P1 + PI + NAD <-> NADH + 13PDG      | 1.2.1.12                   |
| Glyceraldehyde-3-phosphate dehydrogenase-C complex | 714  | <i>gapCIC2</i>     | T3P1 + PI + NAD <-> NADH + 13PDG      | 1.2.1.12                   |
| Phosphoglycerate kinase                            | 10   | <i>pgk</i>         | 13PDG + ADP <-> 3PG + ATP             | 2.7.2.3                    |
| Phosphoglycerate mutase 1                          | 11   | <i>gpmA</i>        | 3PG <-> 2PG                           | 5.4.2.1                    |
| Phosphoglycerate mutase 2                          | 715  | <i>gpmB</i>        | 3PG <-> 2PG                           | 5.4.2.1                    |
| Enolase                                            | 12   | <i>eno</i>         | 2PG <-> PEP                           | 4.2.1.11                   |
| Phosphoenolpyruvate synthase                       | 13   | <i>ppsA</i>        | PYR + ATP -> PEP + AMP + PI           | 2.7.9.2                    |
| Pyruvate Kinase II                                 | 14   | <i>pykA</i>        | PEP + ADP -> PYR + ATP                | 2.7.1.40                   |
| Pyruvate Kinase I                                  | 625  | <i>pykF</i>        | PEP + ADP -> PYR + ATP                | 2.7.1.40                   |
| Pyruvate dehydrogenase                             | 15   | <i>lpdA, aceEF</i> | PYR + COA + NAD -> NADH + CO2 + ACCOA | 1.2.4.1, 2.3.1.12, 1.8.6.4 |
| Glucose-1-phosphate adenyltransferase              | 108  | <i>glgC</i>        | ATP + G1P -> ADPGLC + PPI             | 2.7.7.27                   |
| Glycogen synthase                                  | 685  | <i>glgA</i>        | ADPGLC -> ADP + GLYCOGEN              | 2.4.1.21                   |
| Glycogen phosphorylase                             | 109  | <i>glgP</i>        | GLYCOGEN + PI -> G1P                  | 2.4.1.1                    |
| Maltodextrin phosphorylase                         | 686  | <i>malP</i>        | GLYCOGEN + PI -> G1P                  | 2.4.1.1                    |

**Pentose Phosphate Pathway**

|                                                    |     |             |                                    |          |
|----------------------------------------------------|-----|-------------|------------------------------------|----------|
| Glucose 6-phosphate-1-dehydrogenase                | 59  | <i>zwf</i>  | G6P + NADP <-> D6PGL + NADPH       | 1.1.1.49 |
| 6-Phosphogluconolactonase                          | 60  | <i>pgl</i>  | D6PGL -> D6PGC                     | 3.1.1.31 |
| 6-Phosphogluconate dehydrogenase (decarboxylating) | 61  | <i>gnd</i>  | D6PGC + NADP -> NADPH + CO2 + RL5P | 1.1.1.44 |
| Ribose-5-phosphate isomerase A                     | 62  | <i>rpiA</i> | RL5P <-> R5P                       | 5.3.1.6  |
| Ribose-5-phosphate isomerase B                     | 628 | <i>rpiB</i> | RL5P <-> R5P                       | 5.3.1.6  |
| Ribulose phosphate 3-epimerase                     | 63  | <i>rpe</i>  | RL5P <-> X5P                       | 5.1.3.1  |
| Transketolase I                                    | 64  | <i>tktA</i> | R5P + X5P <-> T3P1 + S7P           | 2.2.1.1  |
| Transketolase II                                   | 690 | <i>tktB</i> | R5P + X5P <-> T3P1 + S7P           | 2.2.1.1  |
| Transketolase I                                    | 65  | <i>tktA</i> | X5P + E4P <-> F6P + T3P1           | 2.2.1.1  |
| Transketolase II                                   | 691 | <i>tktB</i> | X5P + E4P <-> F6P + T3P1           | 2.2.1.1  |
| Transaldolase B                                    | 629 | <i>talB</i> | T3P1 + S7P <-> E4P + F6P           | 2.2.1.2  |
| Phosphogluconate dehydratase                       | 67  | <i>edd</i>  | D6PGC -> 2KD6PG                    | 4.2.1.12 |
| 2-Keto-3-deoxy-6-phosphogluconate aldolase         | 68  | <i>eda</i>  | 2KD6PG -> T3P1 + PYR               | 4.1.2.14 |

**The Tricarboxylic Acid Cycle**

|                               |     |                    |                                        |                          |
|-------------------------------|-----|--------------------|----------------------------------------|--------------------------|
| Citrate synthase              | 69  | <i>gltA</i>        | ACCOA + OA -> COA + CIT                | 4.1.3.7                  |
| Aconitase A                   | 70  | <i>acnA</i>        | CIT <-> ICIT                           | 4.2.1.3                  |
| Aconitase B                   | 630 | <i>acnB</i>        | CIT <-> ICIT                           | 4.2.1.3                  |
| Isocitrate dehydrogenase      | 71  | <i>icdA</i>        | ICIT + NADP <-> CO2 + NADPH + AKG      | 1.1.1.42                 |
| 2-Ketoglutarate dehydrogenase | 72  | <i>sucAB, lpdA</i> | AKG + NAD + COA -> CO2 + NADH + SUCCOA | 1.2.4.2,2.3.1.61,1.8.1.4 |
| Succinyl-CoA synthetase       | 73  | <i>sucCD</i>       | SUCCOA + ADP + PI <-> ATP + COA + SUCC | 6.2.1.5                  |
| Succinate dehydrogenase       | 74  | <i>sdhABCD</i>     | SUCC + FAD -> FADH + FUM               | 1.3.99.1                 |
| Fumarate reductase            | 75  | <i>frdABCD</i>     | FUM + FADH -> SUCC + FAD               | 1.3.99.1                 |
| Fumarase A                    | 76  | <i>fumA</i>        | FUM <-> MAL                            | 4.2.1.2                  |
| Fumarase B                    | 692 | <i>fumB</i>        | FUM <-> MAL                            | 4.2.1.2                  |
| Fumarase C                    | 693 | <i>fumC</i>        | FUM <-> MAL                            | 4.2.1.2                  |
| Malate dehydrogenase          | 77  | <i>mdh</i>         | MAL + NAD <-> NADH + OA                | 1.1.1.37                 |

**Pyruvate Metabolism**

|                            |     |              |                                    |          |
|----------------------------|-----|--------------|------------------------------------|----------|
| D-Lactate dehydrogenase 1  | 589 | <i>dld</i>   | PYR + NADH <-> NAD + LAC           | 1.1.1.28 |
| D-Lactate dehydrogenase 2  | 78  | <i>ldhA</i>  | PYR + NADH <-> NAD + LAC           | 1.1.1.28 |
| Acetaldehyde dehydrogenase | 79  | <i>adhE</i>  | ACCOA +2 NADH <-> ETH +2 NAD + COA | 1.2.1.10 |
| Pyruvate formate lyase 1   | 80  | <i>pflAB</i> | PYR + COA -> ACCOA + FOR           | 2.3.1.54 |
| Pyruvate formate lyase 2   | 694 | <i>pflCD</i> | PYR + COA -> ACCOA + FOR           | 2.3.1.54 |

|                        |     |                                 |                                     |                   |
|------------------------|-----|---------------------------------|-------------------------------------|-------------------|
| Formate hydrogen lyase | 81  | <i>fdhF</i> ,<br><i>hycBEFG</i> | FOR -> CO2                          | 1.2.1.2, 1.12.1.2 |
| Phosphotransacetylase  | 82  | <i>pta</i>                      | ACCOA + PI <-> ACTP + COA           | 2.3.1.8           |
| Acetate kinase A       | 83  | <i>ackA</i>                     | ACTP + ADP <-> ATP + AC             | 2.7.2.1           |
| GAR transformylase T   | 717 | <i>purT</i>                     | ACTP + ADP <-> ATP + AC             | 2.7.2.1           |
| Acetyl-CoA synthetase  | 590 | <i>acs</i>                      | ATP + AC + COA -> AMP + PPI + ACCOA | 6.2.1.1           |

#### Anaplerotic Reactions

|                                   |     |             |                                 |          |
|-----------------------------------|-----|-------------|---------------------------------|----------|
| Phosphoenolpyruvate carboxykinase | 84  | <i>pckA</i> | OA + ATP -> PEP + CO2 + ADP     | 4.1.1.49 |
| Phosphoenolpyruvate carboxylase   | 85  | <i>ppc</i>  | PEP + CO2 -> OA + PI            | 4.1.1.31 |
| Malic enzyme (NADP)               | 86  | <i>maeB</i> | MAL + NADP -> CO2 + NADPH + PYR | 1.1.1.40 |
| Malic enzyme (NAD)                | 87  | <i>maeA</i> | MAL + NAD -> CO2 + NADH + PYR   | 1.1.1.38 |
| Isocitrate lyase                  | 88  | <i>aceA</i> | ICIT -> GLX + SUCC              | 4.1.3.1  |
| Malate synthase A                 | 89  | <i>aceB</i> | ACCOA + GLX -> COA + MAL        | 4.1.3.2  |
| Malate synthase G                 | 695 | <i>glcB</i> | ACCOA + GLX -> COA + MAL        | 4.1.3.2  |
| Inorganic pyrophosphatase         | 721 | <i>ppa</i>  | PPI -> 2 PI                     | 3.6.1.1  |

#### Respiration

|                                                |     |                                                    |                                    |                  |
|------------------------------------------------|-----|----------------------------------------------------|------------------------------------|------------------|
| NADH dehydrogenase II                          | 90  | <i>ndh</i>                                         | NADH + Q -> NAD + QH2              | 1.6.5.3          |
| NADH dehydrogenase I                           | 91  | <i>nuoABEF</i><br><i>GHIJKLM</i><br><i>N</i>       | NADH + Q -> NAD + QH2 +3.5 HEXT    | 1.6.5.3          |
| Formate dehydrogenase-N                        | 92  | <i>fdhGHI</i>                                      | FOR + Q -> QH2 + CO2 +2 HEXT       | 1.2.2.1          |
| Formate dehydrogenase-O                        | 696 | <i>fdoIHG</i>                                      | FOR + Q -> QH2 + CO2 +2 HEXT       | 1.2.2.1          |
| Formate dehydrogenase                          | 697 | <i>fdhF</i>                                        | FOR + Q -> QH2 + CO2 +2 HEXT       | 1.2.2.1          |
| Pyruvate oxidase                               | 93  | <i>poxB</i>                                        | PYR + Q -> AC + CO2 + QH2          | 1.2.2.2          |
| L-Lactate dehydrogenase                        | 94  | <i>lctD</i>                                        | LLAC + Q -> PYR + QH2              | 1.1.2.3          |
| D-Lactate dehydrogenase (cytochrome)           |     | <i>dld</i>                                         | LAC + Q -> PYR + QH2               | 1.1.2.4          |
| Glycerol-3-phosphate dehydrogenase (aerobic)   | 95  | <i>glpD</i>                                        | GL3P + Q -> T3P2 + QH2             | 1.1.99.5         |
| Glycerol-3-phosphate dehydrogenase (anaerobic) | 631 | <i>glpABC</i>                                      | GL3P + Q -> T3P2 + QH2             | 1.1.99.5         |
| Cytochrome oxidase bo3                         | 96  | <i>cyoABCD</i> ,<br><i>cycBC</i> ,<br><i>cydAB</i> | QH2 +5 O2 -> Q +2.5 HEXT           | 1.10.2.2,1.9.3.1 |
| Cytochrome oxidase bd                          | 97  | <i>cydABCD</i> ,<br><i>appBC</i> ,<br><i>cycBC</i> | QH2 +5 O2 -> Q +2 HEXT             | 1.10.2.2,1.9.3.1 |
| Succinate dehydrogenase complex                | 98  | <i>sdhABCD</i>                                     | FADH + Q <-> FAD + QH2             | 1.3.5.1          |
| Thioredoxin reductase                          | 99  | <i>trxB</i>                                        | OTHIO + NADPH -> NADP + RTHIO      | 1.6.4.5          |
| Pyridine nucleotide transhydrogenase           | 100 | <i>pntAB</i>                                       | NADPH + NAD -> NADP + NADH         | 1.6.1.1          |
| Pyridine nucleotide transhydrogenase           | 100 | <i>pntAB</i>                                       | NADP + NADH +2 HEXT -> NADPH + NAD | 1.6.1.1          |
| Hydrogenase 1                                  |     | <i>hyaABC</i>                                      | 2 Q+2 HEXT <-> 2 QH2 + H2          | 1.3.99.1         |
| Hydrogenase 2                                  |     | <i>hybAC</i>                                       | 2 Q+2 HEXT <-> 2 QH2 + H2          | 1.3.99.1         |
| Hydrogenase 3                                  |     | <i>hycFGBE</i>                                     | 2 Q+2 HEXT <-> 2 QH2 + H2          | 1.3.99.1         |
| FOF1-ATPase                                    | 101 | <i>atpABCD</i><br><i>EFGHI</i>                     | ATP <-> ADP + PI +4 HEXT           | 3.6.1.34         |

#### Alternative Carbon Source

|                                                     |    |             |                               |          |
|-----------------------------------------------------|----|-------------|-------------------------------|----------|
| Melibiose                                           |    |             |                               |          |
| Alpha-galactosidase (melibiase)                     | 16 | <i>melA</i> | MELI -> GLC + GLAC            | 3.2.1.22 |
| Galactose                                           |    |             |                               |          |
| Galactokinase                                       | 17 | <i>galK</i> | GLAC + ATP -> GALIP + ADP     | 2.7.1.6  |
| Galactose-1-phosphate uridylyltransferase           | 18 | <i>galT</i> | GALIP + UDPG <-> G1P + UDPGAL | 2.7.7.10 |
| UDP-glucose 4-epimerase                             | 19 | <i>galE</i> | UDPGAL <-> UDPG               | 5.1.3.2  |
| UDP-glucose-1-phosphate uridylyltransferase         | 20 | <i>galU</i> | G1P + UTP <-> UDPG + PPI      | 2.7.7.9  |
| Phosphoglucomutase                                  | 21 | <i>pgm</i>  | G1P <-> G6P                   | 5.4.2.2  |
| Lactose                                             |    |             |                               |          |
| Periplasmic beta-glucosidase precursor              | 22 | <i>bglX</i> | LCTS -> GLC + GLAC            | 3.2.1.21 |
| Beta-galactosidase (LACTase)                        | 23 | <i>lacZ</i> | LCTS -> GLC + GLAC            | 3.2.1.23 |
| Trehalose                                           |    |             |                               |          |
| trehalose-6-phosphate hydrolase                     | 24 | <i>treC</i> | TRE6P -> bDG6P + GLC          | 3.2.1.93 |
| Sucrose                                             |    |             |                               |          |
| Beta-fructofuranosidase                             | 25 |             | SUC6P -> G6P + FRU            | 3.2.1.26 |
| Fructose                                            |    |             |                               |          |
| 1-Phosphofructokinase (Fructose 1-phosphate kinase) | 26 | <i>fruK</i> | F1P + ATP -> FDP + ADP        | 2.7.1.56 |
| Xylose isomerase                                    | 27 | <i>xyIA</i> | FRU -> GLC                    | 5.3.1.5  |
| Mannose                                             |    |             |                               |          |

|                                                |     |              |                                          |           |
|------------------------------------------------|-----|--------------|------------------------------------------|-----------|
| Phosphomannomutase                             | 588 | <i>cpsG</i>  | MAN6P <-> MAN1P                          | 5.4.2.8   |
| Mannose-6-phosphate isomerase                  | 28  | <i>mana</i>  | MAN1P <-> F6P                            | 5.3.1.8   |
| <b>Sorbose</b>                                 |     |              |                                          |           |
| <i>N-Acetylglucosamine</i>                     |     |              |                                          |           |
| N-Acetylglucosamine-6-phosphate deacetylase    | 31  | <i>nagA</i>  | NAGP -> GA6P + AC                        | 3.5.1.25  |
| <i>Glucosamine</i>                             |     |              |                                          |           |
| Glucosamine-6-phosphate deaminase              | 32  | <i>nagB</i>  | GA6P -> F6P + NH3                        | 5.3.1.10  |
| <i>Sialic Acid</i>                             |     |              |                                          |           |
| N-Acetylneuraminatase lyase                    |     | <i>nanA</i>  | SLA -> PYR + NAMAN                       | 4.1.3.3   |
| <b>Fucose</b>                                  |     |              |                                          |           |
| L-Fucose isomerase                             | 33  | <i>fucI</i>  | FUC <-> FCL                              | 5.3.1.-   |
| L-Fuculokinase                                 | 34  | <i>fucK</i>  | FCL + ATP -> FCL1P + ADP                 | 2.7.1.51  |
| L-Fuculose phosphate aldolase                  | 35  | <i>fucA</i>  | FCL1P <-> LACAL + T3P2                   | 4.1.2.17  |
| Lactaldehyde reductase                         | 36  | <i>fucO</i>  | LACAL + NADH <-> 12PPD + NAD             | 1.1.1.77  |
| Aldehyde dehydrogenase A                       | 37  | <i>aldA</i>  | LACAL + NAD <-> LLAC + NADH              | 1.2.1.22  |
| Aldehyde dehydrogenase B                       | 687 | <i>aldB</i>  | LACAL + NAD <-> LLAC + NADH              | 1.2.1.22  |
| Aldehyde dehydrogenase                         | 722 | <i>adhC</i>  | LACAL + NAD <-> LLAC + NADH              | 1.1.1.1   |
| Aldehyde dehydrogenase                         | 725 | <i>adhE</i>  | GLAL + NADH <-> GL + NAD                 | 1.1.1.1   |
| Aldehyde dehydrogenase                         | 723 | <i>adhE</i>  | LACAL + NAD -> LLAC + NADH               | 1.1.1.1   |
| Aldehyde dehydrogenase                         | 724 | <i>aldH</i>  | LACAL + NAD <-> LLAC + NADH              | 1.2.1.3   |
| Aldehyde dehydrogenase                         | 726 | <i>aldH</i>  | ACAL + NAD -> AC + NADH                  | 1.2.1.3   |
| <i>Gluconate</i>                               |     |              |                                          |           |
| Gluconokinase I                                | 38  | <i>gntV</i>  | GLCN + ATP -> D6PGC + ADP                |           |
| Gluconokinase II                               | 626 | <i>gntK</i>  | GLCN + ATP -> D6PGC + ADP                |           |
| <b>Rhamnose</b>                                |     |              |                                          |           |
| L-Rhamnose isomerase                           | 39  | <i>rhaA</i>  | RMN <-> RML                              | 5.3.1.14  |
| Rhamnulokinase                                 | 40  | <i>rhaB</i>  | RML + ATP -> RML1P + ADP                 | 2.7.1.5   |
| Rhamnulose-1-phosphate aldolase                | 41  | <i>rhaD</i>  | RML1P <-> LACAL + T3P2                   | 4.1.2.19  |
| <i>Arabinose</i>                               |     |              |                                          |           |
| L-Arabinose isomerase                          | 42  | <i>araA</i>  | ARAB <-> RBL                             | 5.3.1.4   |
| Arabinose-5-phosphate isomerase                | 43  |              | RL5P <-> A5P                             | 5.3.1.13  |
| L-Ribulokinase                                 | 44  | <i>araB</i>  | RBL + ATP -> RL5P + ADP                  | 2.7.1.16  |
| L-Ribulose-phosphate 4-epimerase               | 45  | <i>araD</i>  | RL5P <-> X5P                             | 5.1.3.4   |
| <i>Xylose</i>                                  |     |              |                                          |           |
| Xylose isomerase                               | 46  | <i>xylA</i>  | XYL <-> XUL                              | 5.3.1.5   |
| Xylulokinase                                   | 47  | <i>xylB</i>  | XUL + ATP -> X5P + ADP                   | 2.7.1.17  |
| <b>Ribose</b>                                  |     |              |                                          |           |
| Ribokinase                                     | 48  | <i>rbsK</i>  | RIB + ATP -> R5P + ADP                   | 2.7.1.15  |
| <i>Mannitol</i>                                |     |              |                                          |           |
| Mannitol-1-phosphate 5-dehydrogenase           | 49  | <i>mltD</i>  | MNT6P + NAD <-> F6P + NADH               | 1.1.1.17  |
| <i>Glucitol</i>                                |     |              |                                          |           |
| Glucitol-6-phosphate dehydrogenase             | 50  | <i>srlD</i>  | GLT6P + NAD <-> F6P + NADH               | 1.1.1.140 |
| <i>Galactitol</i>                              |     |              |                                          |           |
| Galactitol-1-phosphate dehydrogenase           | 51  | <i>gatD</i>  | GLTL1P + NAD <-> TAG6P + NADH            | 1.1.1.-   |
| Phosphofruktokinase B                          | 52  | <i>pfkB</i>  | TAG6P + ATP -> TAG16P + ADP              | 2.7.1.11  |
| 1-Phosphofruktokinase                          | 627 | <i>fruK</i>  | TAG6P + ATP -> TAG16P + ADP              | 2.7.1.56  |
| Tagatose-6-phosphate kinase                    | 688 | <i>agaZ</i>  | TAG6P + ATP -> TAG16P + ADP              | 2.7.1.-   |
| Tagatose-bisphosphate aldolase 2               | 53  | <i>gatY</i>  | TAG16P <-> T3P2 + T3P1                   | 4.1.2.-   |
| Tagatose-bisphosphate aldolase 1               | 689 | <i>agaY</i>  | TAG16P <-> T3P2 + T3P1                   | 4.1.2.-   |
| <i>Glycerol</i>                                |     |              |                                          |           |
| Glycerol kinase                                | 54  | <i>glpK</i>  | GL + ATP -> GL3P + ADP                   | 2.7.1.30  |
| Glycerol-3-phosphate-dehydrogenase-[NAD(P)+]   | 55  | <i>gpsA</i>  | GL3P + NADP <-> T3P2 + NADPH             | 1.1.1.94  |
| <i>Nucleosides and Deoxynucleosides</i>        |     |              |                                          |           |
| Phosphopentomutase                             | 56  | <i>deoB</i>  | DR1P <-> DR5P                            | 5.4.2.7   |
| Phosphopentomutase                             | 57  | <i>deoB</i>  | R1P <-> R5P                              | 5.4.2.7   |
| Deoxyribose-phosphate aldolase                 | 58  | <i>deoC</i>  | DR5P -> ACAL + T3P1                      | 4.1.2.4   |
| <b>Aspartate &amp; Asparagine Biosynthesis</b> |     |              |                                          |           |
| Aspartate transaminase                         | 102 | <i>aspC</i>  | OA + GLU <-> ASP + AKG                   | 2.6.1.1   |
| Asparagine synthetase (Glutamate dependent)    | 103 | <i>asnB</i>  | ASP + ATP + GLN -> GLU + ASN + AMP + PPI | 6.3.5.4   |
| Aspartate-ammonia ligase                       | 104 | <i>asnA</i>  | ASP + ATP + NH3 -> ASN + AMP + PPI       | 6.3.1.1   |
| <b>Glutamate and Glutamine Biosynthesis</b>    |     |              |                                          |           |
| Glutamate dehydrogenase                        | 105 | <i>gdhA</i>  | AKG + NH3 + NADPH <-> GLU + NADP         | 1.4.1.4   |
| Glutamate-ammonia ligase                       | 106 | <i>glnA</i>  | GLU + NH3 + ATP -> GLN + ADP + PI        | 6.3.1.2   |
| Glutamate synthase                             | 107 | <i>glnBD</i> | AKG + GLN + NADPH -> NADP + 2 GLU        | 1.4.1.13  |
| <b>Alanine Biosynthesis</b>                    |     |              |                                          |           |
| Alanine transaminase                           | 110 | <i>alaB</i>  | PYR + GLU <-> AKG + ALA                  | 2.6.1.2   |
| Valine-pyruvate aminotransferase               | 632 | <i>avtA</i>  | OIVAL + ALA -> PYR + VAL                 | 2.6.1.66  |
| Alanine racemase, biosynthetic                 | 112 | <i>alr</i>   | ALA <-> DALA                             | 5.1.1.1   |

|                                                          |     |                  |                                             |           |
|----------------------------------------------------------|-----|------------------|---------------------------------------------|-----------|
| Alanine racemase, catabolic                              | 113 | <i>dadX</i>      | ALA -> DALA                                 | 5.1.1.1   |
| <b>Arginine, Putriscine, and Spermidine Biosynthesis</b> |     |                  |                                             |           |
| N-Acetylglutamate synthase                               | 114 | <i>argA</i>      | GLU + ACCOA -> COA + NAGLU                  | 2.3.1.1   |
| N-Acetylglutamate kinase                                 | 115 | <i>argB</i>      | NAGLU + ATP -> ADP + NAGLUYP                | 2.7.2.8   |
| N-Acetylglutamate phosphate reductase                    | 116 | <i>argC</i>      | NAGLUYP + NADPH <-> NADP + PI + NAGLUSAL    | 1.2.1.38  |
| Acetylmithine transaminase                               | 117 | <i>argD</i>      | NAGLUSAL + GLU <-> AKG + NAARON             | 2.6.1.11  |
| Acetylmithine deacetylase                                | 118 | <i>argE</i>      | NAARON -> AC + ORN                          | 3.5.1.16  |
| Carbamoyl phosphate synthetase                           | 119 | <i>carAB</i>     | GLN + 2 ATP + CO2 -> GLU + CAP + 2 ADP + PI | 6.3.5.5   |
| Ornithine carbamoyl transferase 1                        | 120 | <i>argF</i>      | ORN + CAP <-> CITR + PI                     | 2.1.3.3   |
| Ornithine carbamoyl transferase 2                        | 633 | <i>argI</i>      | ORN + CAP <-> CITR + PI                     | 2.1.3.3   |
| Ornithine transaminase                                   |     | <i>ygjGH</i>     | ORN + AKG -> GLUGSAL + GLU                  | 2.6.1.13  |
| Argininosuccinate synthase                               | 121 | <i>argG</i>      | CITR + ASP + ATP -> AMP + PPI + ARGSUCC     | 6.3.4.5   |
| Argininosuccinate lyase                                  | 122 | <i>argH</i>      | ARGSUCC <-> FUM + ARG                       | 4.3.2.1   |
| Arginine decarboxylase, biosynthetic                     | 123 | <i>speA</i>      | ARG -> CO2 + AGM                            | 4.1.1.19  |
| Arginine decarboxylase, degradative                      | 634 | <i>adi</i>       | ARG -> CO2 + AGM                            | 4.1.1.19  |
| Agmatinase                                               | 124 | <i>speB</i>      | AGM -> UREA + PTRC                          | 3.5.3.11  |
| Ornithine decarboxylase, biosynthetic                    | 125 | <i>speC</i>      | ORN -> PTRC + CO2                           | 4.1.1.17  |
| Ornithine decarboxylase, degradative                     | 635 | <i>speF</i>      | ORN -> PTRC + CO2                           | 4.1.1.17  |
| Adenosylmethionine decarboxylase                         | 126 | <i>speD</i>      | SAM <-> DSAM + CO2                          | 4.1.1.50  |
| Spermidine synthase                                      | 127 | <i>speE</i>      | PTRC + DSAM -> SPMD + 5MTA                  | 2.5.1.16  |
| Methylthioadenosine nucleosidase                         | 128 |                  | 5MTA -> AD + 5MTR                           | 3.2.2.16  |
| 5-Methylthioribose kinase                                | 129 |                  | 5MTR + ATP -> 5MTRP + ADP                   | 2.7.1.100 |
| 5-Methylthioribose-1-phosphate isomerase                 | 130 |                  | 5MTRP <-> 5MTR1P                            | 5.3.1.23  |
| E-1 (Enolase-phosphatase)                                | 131 |                  | 5MTR1P -> DKMPP                             |           |
| E-3 (Unknown)                                            | 132 |                  | DKMPP -> FOR + KMB                          |           |
| Transamination (Unknown)                                 | 133 |                  | KMB + GLN -> GLU + MET                      |           |
| <b>Proline biosynthesis</b>                              |     |                  |                                             |           |
| $\gamma$ -Glutamyl kinase                                | 134 | <i>proB</i>      | GLU + ATP -> ADP + GLUP                     | 2.7.2.11  |
| Glutamate-5-semialdehyde dehydrogenase                   | 135 | <i>proA</i>      | GLUP + NADPH -> NADP + PI + GLUGSAL         | 1.2.1.41  |
| N-Acetylmithine deacetylase                              | 136 | <i>argE</i>      | NAGLUSAL -> GLUGSAL + AC                    |           |
| Pyrroline-5-carboxylate reductase                        | 137 | <i>proC</i>      | GLUGSAL + NADPH -> PRO + NADP               | 1.5.1.2   |
| <b>Branched Chain Amino Acid Biosynthesis</b>            |     |                  |                                             |           |
| Threonine dehydratase, biosynthetic                      | 138 | <i>ilvA</i>      | THR -> NH3 + OBUT                           | 4.2.1.16  |
| Threonine dehydratase, catabolic                         | 718 | <i>tdcB</i>      | THR -> NH3 + OBUT                           | 4.2.1.16  |
| Acetohydroxybutanoate synthase I                         | 139 | <i>ilvBN</i>     | OBUT + PYR -> ABUT + CO2                    | 4.1.3.18  |
| Acetohydroxybutanoate synthase II                        | 698 | <i>ilvG(12)M</i> | OBUT + PYR -> ABUT + CO2                    | 4.1.3.18  |
| Acetohydroxybutanoate synthase III                       | 699 | <i>ilvIH</i>     | OBUT + PYR -> ABUT + CO2                    | 4.1.3.18  |
| Acetohydroxy Acid isomeroreductase                       | 140 | <i>ilvC</i>      | ABUT + NADPH -> NADP + DHMVA                | 1.1.1.86  |
| Dihydroxy acid dehydratase                               | 141 | <i>ilvD</i>      | DHMVA -> OMVAL                              | 4.2.1.9   |
| Branched chain amino acid aminotransferase               | 142 | <i>ilvE</i>      | OMVAL + GLU <-> AKG + ILE                   | 4.6.1.42  |
| Acetolactate synthase I                                  | 143 | <i>ilvBN</i>     | 2 PYR -> CO2 + ACLAC                        | 4.1.3.18  |
| Acetolactate synthase II                                 | 700 | <i>ilvG(12)M</i> | 2 PYR -> CO2 + ACLAC                        | 4.1.3.18  |
| Acetolactate synthase III                                | 701 | <i>ilvIH</i>     | 2 PYR -> CO2 + ACLAC                        | 4.1.3.18  |
| Acetohydroxy acid isomeroreductase                       | 144 | <i>ilvC</i>      | ACLAC + NADPH -> NADP + DHVAL               | 1.1.1.86  |
| Dihydroxy acid dehydratase                               | 145 | <i>ilvD</i>      | DHVAL -> OIVAL                              | 4.2.1.9   |
| Branched chain amino acid aminotransferase               | 146 | <i>ilvE</i>      | OIVAL + GLU -> AKG + VAL                    | 2.6.1.42  |
| Valine-pyruvate aminotransferase                         | 636 | <i>avtA</i>      | OIVAL + ALA -> PYR + VAL                    | 2.6.1.66  |
| Isopropylmalate synthase                                 | 148 | <i>leuA</i>      | ACCOA + OIVAL -> COA + CBHCAP               | 4.1.3.12  |
| Isopropylmalate isomerase                                | 149 | <i>leuCD</i>     | CBHCAP <-> IPPMAL                           | 4.2.1.33  |
| 3-Isopropylmalate dehydrogenase                          | 150 | <i>leuB</i>      | IPPMAL + NAD -> NADH + OICAP + CO2          | 1.1.1.85  |
| Branched chain amino acid aminotransferase               | 151 | <i>ilvE</i>      | OICAP + GLU -> AKG + LEU                    | 2.6.1.42  |
| Aromatic amino acid transaminase                         | 152 | <i>tyrB</i>      | OICAP + GLU -> AKG + LEU                    | 2.6.1.42  |
| <b>Aromatic Amino Acids</b>                              |     |                  |                                             |           |
| 2-Dehydro-3-deoxyphosphoheptonate aldolase F             | 153 | <i>aroF</i>      | E4P + PEP -> PI + 3DDAH7P                   | 4.1.2.15  |
| 2-Dehydro-3-deoxyphosphoheptonate aldolase G             | 702 | <i>aroG</i>      | E4P + PEP -> PI + 3DDAH7P                   | 4.1.2.15  |
| 2-Dehydro-3-deoxyphosphoheptonate aldolase H             | 154 | <i>aroH</i>      | E4P + PEP -> PI + 3DDAH7P                   | 4.1.2.15  |
| 3-Dehydroquinate synthase                                | 155 | <i>aroB</i>      | 3DDAH7P -> DQT + PI                         | 4.6.1.3   |
| 3-Dehydroquinate dehydratase                             | 156 | <i>aroD</i>      | DQT <-> DHSK                                | 4.2.1.10  |
| Shikimate dehydrogenase                                  | 157 | <i>aroE</i>      | DHSK + NADPH <-> SME + NADP                 | 1.1.1.25  |
| Shikimate kinase I                                       | 158 | <i>aroK</i>      | SME + ATP -> ADP + SME5P                    | 2.7.1.71  |
| Shikimate kinase II                                      | 637 | <i>aroL</i>      | SME + ATP -> ADP + SME5P                    | 2.7.1.71  |
| 3-Phosphoshikimate-1-carboxyvinyltransferase             | 159 | <i>aroA</i>      | SME5P + PEP <-> 3PSME + PI                  | 2.5.1.19  |
| Chorismate synthase                                      | 160 | <i>aroC</i>      | 3PSME -> PI + CHOR                          | 4.6.1.4   |
| Chorismate mutase 1                                      | 161 | <i>pheA</i>      | CHOR -> PHEN                                | 5.4.99.5  |

|                                                                |     |                |                                                                        |           |
|----------------------------------------------------------------|-----|----------------|------------------------------------------------------------------------|-----------|
| Prephenate dehydratase                                         | 162 | <i>pheA</i>    | PHEN -> CO <sub>2</sub> + PHPYR                                        | 4.2.1.51  |
| Aromatic amino acid transaminase                               | 163 | <i>tyrB</i>    | PHPYR + GLU <-> AKG + PHE                                              | 2.6.1.57  |
| Chorismate mutase 2                                            | 164 | <i>tyrA</i>    | CHOR -> PHEN                                                           | 5.4.99.5  |
| Prephanate dehydrogenase                                       | 165 | <i>tyrA</i>    | PHEN + NAD -> HPHPYR + CO <sub>2</sub> + NADH                          | 1.3.1.12  |
| Aromatic amino acid transaminase                               | 166 | <i>tyrB</i>    | HPHPYR + GLU <-> AKG + TYR                                             | 2.6.1.5   |
| Aspartate transaminase                                         | 102 | <i>aspC</i>    | HPHPYR + GLU <-> AKG + TYR                                             | 2.6.1.1   |
| Anthranilate synthase                                          | 167 | <i>trpDE</i>   | CHOR + GLN -> GLU + PYR + AN                                           | 4.1.3.27  |
| Anthranilate synthase component II                             | 168 | <i>trpD</i>    | AN + PRPP -> PPI + NPRAN                                               | 2.4.2.18  |
| Phosphoribosyl anthranilate isomerase                          | 169 | <i>trpC</i>    | NPRAN -> CPAD5P                                                        | 5.3.1.24  |
| Indoleglycerol phosphate synthase                              | 170 | <i>trpC</i>    | CPAD5P -> CO <sub>2</sub> + IGP                                        | 4.1.1.48  |
| Tryptophan synthase                                            | 171 | <i>trpAB</i>   | IGP + SER -> T3P1 + TRP                                                | 4.2.1.20  |
| <b>Histidine Biosynthesis</b>                                  |     |                |                                                                        |           |
| Phosphoribosyl pyrophosphate synthase                          | 172 | <i>prsA</i>    | R5P + ATP <-> PRPP + AMP                                               | 2.7.6.1   |
| ATP phosphoribosyltransferase                                  | 173 | <i>hisG</i>    | PRPP + ATP -> PPI + PRBATP                                             | 2.4.2.17  |
| Phosphoribosyl-ATP pyrophosphatase                             | 174 | <i>hisIE</i>   | PRBATP -> PPI + PRBAMP                                                 | 3.6.1.31  |
| Phosphoribosyl-AMP cyclohydrolase                              | 175 | <i>hisIE</i>   | PRBAMP -> PRFP                                                         | 3.5.4.19  |
| Phosphoribosylformimino-5-amino-1-phosphoribosyl-4-imidazole c | 176 | <i>hisA</i>    | PRFP -> PRLP                                                           | 5.3.1.16  |
| Imidazoleglycerol phosphate synthase                           | 177 | <i>hisFH</i>   | PRLP + GLN -> GLU + AICAR + DIMGP                                      | 2.4.2.-   |
| Imidazoleglycerol phosphate dehydratase                        | 178 | <i>hisB</i>    | DIMGP -> IMACP                                                         | 4.2.1.19  |
| L-Histidinol phosphate aminotransferase                        | 179 | <i>hisC</i>    | IMACP + GLU -> AKG + HISOLP                                            | 2.6.1.9   |
| Histidinol phosphatase                                         | 180 | <i>hisB</i>    | HISOLP -> PI + HISOL                                                   | 3.1.3.15  |
| Histidinol dehydrogenase                                       | 181 | <i>hisD</i>    | HISOL + 3 NAD -> HIS + 3 NADH                                          | 1.1.1.23  |
| <b>Serine &amp; Glycine Biosynthesis</b>                       |     |                |                                                                        |           |
| 3-Phosphoglycerate dehydrogenase                               | 182 | <i>serA</i>    | 3PG + NAD -> NADH + PHP                                                | 1.1.1.95  |
| Phosphoserine transaminase                                     | 183 | <i>serC</i>    | PHP + GLU -> AKG + 3PSER                                               | 2.6.1.52  |
| Phosphoserine phosphatase                                      | 184 | <i>serB</i>    | 3PSER -> PI + SER                                                      | 3.1.3.3   |
| Glycine hydroxymethyltransferase                               | 185 | <i>glyA</i>    | THF + SER -> GLY + METTHF                                              | 2.1.2.1   |
| Threonine dehydrogenase                                        | 186 | <i>tdh</i>     | THR + COA -> GLY + ACCOA                                               | 1.1.1.103 |
| Amino ketobutyrate CoA ligase                                  | 638 | <i>kbl</i>     | THR + COA -> GLY + ACCOA                                               | 2.3.1.29  |
| <b>Cysteine Biosynthesis</b>                                   |     |                |                                                                        |           |
| Sulfate adenyltransferase                                      | 187 | <i>cysDN</i>   | SLF + ATP + GTP -> PPI + APS + GDP + PI                                | 2.7.7.4   |
| Adenylylsulfate kinase                                         | 188 | <i>cysC</i>    | APS + ATP -> ADP + PAPS                                                | 2.7.1.25  |
| 3'-Phospho-adenylylsulfate reductase                           | 189 | <i>cysH</i>    | PAPS + RTHIO -> OTHIO + H <sub>2</sub> SO <sub>3</sub> + PAP           | 1.8.99.-  |
| Sulfite reductase                                              | 190 | <i>cysII</i>   | H <sub>2</sub> SO <sub>3</sub> + 3 NADPH <-> H <sub>2</sub> S + 3 NADP | 1.8.1.2   |
| Serine transacetylase                                          | 191 | <i>cysE</i>    | SER + ACCOA <-> COA + ASER                                             | 2.3.1.30  |
| O-Acetylserine (thiol)-lyase A                                 | 192 | <i>cysK</i>    | ASER + H <sub>2</sub> S -> AC + CYS                                    | 4.2.99.8  |
| O-Acetylserine (thiol)-lyase B                                 | 639 | <i>cysM</i>    | ASER + H <sub>2</sub> S -> AC + CYS                                    | 4.2.99.8  |
| 3' - 5' Bisphosphate nucleotidase                              | 193 |                | PAP -> AMP + PI                                                        | 3.1.3.7   |
| <b>Threonine and Lysine Biosynthesis</b>                       |     |                |                                                                        |           |
| Aspartate kinase I                                             | 194 | <i>thrA</i>    | ASP + ATP <-> ADP + BASP                                               | 2.7.2.4   |
| Aspartate kinase II                                            | 640 | <i>metL</i>    | ASP + ATP <-> ADP + BASP                                               | 2.7.2.4   |
| Aspartate kinase III                                           | 641 | <i>lysC</i>    | ASP + ATP <-> ADP + BASP                                               | 2.7.2.4   |
| Aspartate semialdehyde dehydrogenase                           | 195 | <i>asd</i>     | BASP + NADPH <-> NADP + PI + ASPSA                                     | 1.2.1.11  |
| Homoserine dehydrogenase I                                     | 196 | <i>thrA</i>    | ASPSA + NADPH <-> NADP + HSER                                          | 1.1.1.3   |
| Homoserine dehydrogenase II                                    | 642 | <i>metL</i>    | ASPSA + NADPH <-> NADP + HSER                                          | 1.1.1.3   |
| Homoserine kinase                                              | 197 | <i>thrB</i>    | HSER + ATP -> ADP + PHSER                                              | 2.7.1.39  |
| Threonine synthase                                             | 198 | <i>thrC</i>    | PHSER -> PI + THR                                                      | 4.2.99.2  |
| Dihydrodipicolinate synthase                                   | 199 | <i>dapA</i>    | ASPSA + PYR -> D23PIC                                                  | 4.2.1.52  |
| Dihydrodipicolinate reductase                                  | 200 | <i>dapB</i>    | D23PIC + NADPH -> NADP + PIP26DX                                       | 1.3.1.26  |
| Tetrahydrodipicolinate succinylase                             | 201 | <i>dapD</i>    | PIP26DX + SUCCOA -> COA + NS2A6O                                       | 2.3.1.117 |
| Succinyl diaminopimelate aminotransferase                      | 202 | <i>dapC</i>    | NS2A6O + GLU <-> AKG + NS26DP                                          | 2.6.1.17  |
| Succinyl diaminopimelate desuccinylase                         | 203 | <i>dapE</i>    | NS26DP -> SUCC + D26PIM                                                | 3.5.1.18  |
| Diaminopimelate epimerase                                      | 204 | <i>dapF</i>    | D26PIM <-> MDAP                                                        | 5.1.1.7   |
| Diaminopimelate decarboxylase                                  | 205 | <i>lysA</i>    | MDAP -> CO <sub>2</sub> + LYS                                          | 4.1.1.20  |
| Lysine decarboxylase 1                                         | 591 | <i>cadA</i>    | LYS -> CO <sub>2</sub> + CADV                                          | 4.1.1.18  |
| Lysine decarboxylase 2                                         | 643 | <i>ldcC</i>    | LYS -> CO <sub>2</sub> + CADV                                          | 4.1.1.18  |
| <b>Methionine Biosynthesis</b>                                 |     |                |                                                                        |           |
| Homoserine transsuccinylase                                    | 206 | <i>metA</i>    | HSER + SUCCOA -> COA + OSLHSER                                         | 2.3.1.46  |
| O-succinylhomoserine lyase                                     | 207 | <i>metB</i>    | OSLHSER + CYS -> SUCC + LLCT                                           | 4.2.99.9  |
| Cystathionine-β-lyase                                          | 208 | <i>metC</i>    | LLCT -> HCYS + PYR + NH <sub>3</sub>                                   | 4.4.1.8   |
| Adenosyl homocysteine (Unknown)                                | 209 | <i>Unknown</i> | HCYS + ADN <-> SAH                                                     | 3.3.1.1 ? |
| Cobalamin-dependent methionine synthase                        | 210 | <i>metH</i>    | HCYS + MTHF -> MET + THF                                               | 2.1.1.13  |
| Cobalamin-independent methionine synthase                      | 211 | <i>metE</i>    | HCYS + MTHF -> MET + THF                                               | 2.1.1.14  |
| S-Adenosylmethionine synthetase                                | 212 | <i>metK</i>    | MET + ATP -> PPI + PI + SAM                                            | 2.5.1.6   |

## Amino Acid Degradation

### Alanine

D-Amino acid dehydrogenase 213 *dadA* DALA + FAD -> PYR + NH3 + FADH 1.4.99.1

### Arginine

Putrescine transaminase 214 *pat* PTRC + AKG -> GABAL + GLU  
Amino oxidase 703 *tynA* PTRC -> GABAL + NH3 1.4.3.6  
Aminobutyraldehyde dehydrogenase 215 *prp* GABAL + NAD -> GABA + NADH 1.2.1.19  
Aldehyde dehydrogenase 704 *aldH* GABAL + NAD -> GABA + NADH 1.2.1.3  
Aminobutyrate aminotransaminase 1 216 *gabT* GABA + AKG -> SUCCSAL + GLU 2.6.1.19  
Aminobutyrate aminotransaminase 2 705 *goaG* GABA + AKG -> SUCCSAL + GLU 2.6.1.19  
Succinate semialdehyde dehydrogenase -NAD 217 *sad* SUCCSAL + NAD -> SUCC + NADH 1.2.1.16  
Succinate semialdehyde dehydrogenase -NADP 218 *gabD* SUCCSAL + NADP -> SUCC + NADPH 1.2.1.16

### Asparagine

Asparinase I 219 *ansA* ASN -> ASP + NH3 3.5.1.1  
Asparinase II 706 *ansB* ASN -> ASP + NH3 3.5.1.1

### Aspartate

Aspartate ammonia-lyase 220 *aspA* ASP -> FUM + NH3 4.3.1.1

### Cysteine

Tryptophanase 221 *tnaA* CYS -> PYR + NH3 + H2S 4.1.99.1  
L-Cysteine desulfhydrase 222 CYS -> PYR + NH3 + H2S

### Glutamate

Glutamate decarboxylase A 592 *gadA* GLU -> GABA + CO2 4.1.1.15  
Glutamate decarboxylase B 719 *gadB* GLU -> GABA + CO2 4.1.1.15

### Glutamine

Glutaminase A 223 GLN -> GLU + NH3 3.5.1.2  
Glutaminase B 707 GLN -> GLU + NH3 3.5.1.2

Glycine - Does not utilize

Histidine - Does not utilize

Isoleucine - Does not utilize

Leucine - Does not utilize

Lysine - Does not utilize

Methionine - Does not utilize

Phenylalanine - Does not utilize

### Proline

Proline dehydrogenase 224 *putA* PRO + FAD -> FADH + GLUGSAL 1.5.99.8  
Pyrroline-5-carboxylate dehydrogenase 225 *putA* GLUGSAL + NAD -> NADH + GLU 1.5.1.12

### Serine

Serine deaminase 1 226 *sdaA* SER -> PYR + NH3 4.2.1.13  
Serine deaminase 2 644 *sdaB* SER -> PYR + NH3 4.2.1.13  
Tryptophanase 227 *tnaA* SER -> PYR + NH3  
D-Serine deaminase 593 *dsdA* DSER -> PYR + NH3 4.2.1.14

### Threonine

Threonine dehydrogenase 228 *tdh* THR + NAD -> 2A3O + NADH 1.1.1.103  
Amino ketobutyrate ligase 229 *kbl* 2A3O + COA -> ACCOA + GLY 2.3.1.29  
Threonine dehydratase catabolic 594 *tdcB* THR -> OBUT + NH3 4.2.1.16  
Threonine deaminase 1 720 *sdaA* THR -> OBUT + NH3  
Threonine deaminase 2 366 *sdaB* THR -> OBUT + NH3

### Tryptophan

Tryptophanase 230 *tnaA* TRP <-> INDOLE + PYR + NH3 4.1.99.1

Tyrosine - Does not utilize

Valine - Does not utilize

## Purine Biosynthesis

Amidophosphoribosyl transferase 231 *purF* PRPP + GLN -> PPI + GLU + PRAM 2.4.2.14  
Phosphoribosylamine-glycine ligase 232 *purD* PRAM + ATP + GLY <-> ADP + PI + GAR 6.3.4.13  
Phosphoribosylglycinamide formyltransferase 233 *purN* GAR + FTHF -> THF + FGAR 2.1.2.2  
GAR transformylase T 234 *purT* GAR + FOR + ATP -> ADP + PI + FGAR 2.1.2.-  
Phosphoribosylformylglycinamide synthetase 235 *purL* FGAR + ATP + GLN -> GLU + ADP + PI + FGAM 6.3.5.3  
Phosphoribosylformylglycinamide cyclo-ligase 236 *purM* FGAM + ATP -> ADP + PI + AIR 6.3.3.1  
Phosphoribosylaminoimidazole carboxylase 1 237 *purK* AIR + CO2 + ATP <-> NCAIR + ADP + PI 4.1.1.21  
Phosphoribosylaminoimidazole carboxylase 2 238 *purE* NCAIR <-> CAIR 4.1.1.21  
Phosphoribosylaminoimidazole-succinocarboxamide synthetase 239 *purC* CAIR + ATP + ASP -> ADP + PI + SAICAR 6.3.2.6  
5'-Phosphoribosyl-4-(N-succinocarboxamide)-5-aminoimidazole lyase 240 *purB* SAICAR <-> FUM + AICAR 4.3.2.2  
AICAR transformylase 241 *purH* AICAR + FTHF <-> THF + PRFICA 2.1.2.3  
IMP cyclohydrolase 242 *purH* PRFICA <-> IMP 3.5.4.10  
Adenylosuccinate synthetase 243 *purA* IMP + GTP + ASP -> GDP + PI + ASUC 6.3.4.4  
Adenylosuccinate lyase 244 *purB* ASUC <-> FUM + AMP 4.3.2.2  
IMP dehydrogenase 245 *guaB* IMP + NAD -> NADH + XMP 1.1.1.205  
GMP synthase 246 *guaA* XMP + ATP + GLN -> GLU + AMP + PPI + GMP 6.3.4.1  
GMP reductase 247 *guaC* GMP + NADPH -> NADP + IMP + NH3 1.6.6.8

## Pyrimidine Biosynthesis

|                                    |     |              |                                         |          |
|------------------------------------|-----|--------------|-----------------------------------------|----------|
| Aspartate-carbamoyltransferase     | 248 | <i>pyrBI</i> | CAP + ASP -> CAASP + PI                 | 2.1.3.2  |
| Dihydroorotase                     | 249 | <i>pyrC</i>  | CAASP <-> DOROA                         | 3.5.2.3  |
| Dihydroorotate dehydrogenase       | 250 | <i>pyrD</i>  | DOROA + Q <-> QH2 + OROA                | 1.3.3.1  |
| Orotate phosphoribosyl transferase | 251 | <i>pyrE</i>  | OROA + PRPP <-> PPI + OMP               | 2.4.2.10 |
| OMP decarboxylase                  | 252 | <i>pyrF</i>  | OMP -> CO2 + UMP                        | 4.1.1.23 |
| CTP synthetase                     | 253 | <i>pyrG</i>  | UTP + GLN + ATP -> GLU + CTP + ADP + PI | 6.3.4.2  |

## Salvage Pathways

|                                            |     |             |                           |          |
|--------------------------------------------|-----|-------------|---------------------------|----------|
| Adenylate kinase                           | 254 | <i>adk</i>  | ATP + AMP <-> 2 ADP       | 2.7.4.3  |
| Adenylate kinase                           |     | <i>adk</i>  | GTP + AMP <-> ADP + GDP   | 2.7.4.3  |
| Adenylate kinase                           |     | <i>adk</i>  | ITP + AMP <-> ADP + IDP   | 2.7.4.3  |
| Adenylate kinase                           | 255 | <i>adk</i>  | DAMP + ATP <-> ADP + DADP | 2.7.4.11 |
| Guanylate kinase                           | 256 | <i>gmk</i>  | GMP + ATP <-> GDP + ADP   | 2.7.4.8  |
| Deoxyguanylate kinase                      | 257 | <i>gmk</i>  | DGMP + ATP <-> DGDP + ADP | 2.7.4.8  |
| Nucleoside-diphosphate kinase              | 258 | <i>ndk</i>  | GDP + ATP <-> GTP + ADP   | 2.7.4.6  |
| Nucleoside-diphosphate kinase              | 259 | <i>ndk</i>  | UDP + ATP <-> UTP + ADP   | 2.7.4.6  |
| Nucleoside-diphosphate kinase              | 260 | <i>ndk</i>  | CDP + ATP <-> CTP + ADP   | 2.7.4.6  |
| Nucleoside-diphosphate kinase              | 262 | <i>ndk</i>  | DGDP + ATP <-> DGTP + ADP | 2.7.4.6  |
| Nucleoside-diphosphate kinase              | 263 | <i>ndk</i>  | DUDP + ATP <-> DUTP + ADP | 2.7.4.6  |
| Nucleoside-diphosphate kinase              | 264 | <i>ndk</i>  | DCDP + ATP <-> DCTP + ADP | 2.7.4.6  |
| Nucleoside-diphosphate kinase              | 266 | <i>ndk</i>  | DADP + ATP <-> DATP + ADP | 2.7.4.6  |
| Nucleoside-diphosphate kinase              | 267 | <i>ndk</i>  | DTDP + ATP <-> DTTP + ADP | 2.7.4.6  |
| AMP Nucleosidse                            | 268 | <i>amn</i>  | AMP -> AD + R5P           | 3.2.2.4  |
| Adenosine deaminase                        | 269 | <i>add</i>  | ADN -> INS + NH3          | 3.5.4.4  |
| Deoxyadenosine deaminase                   | 678 | <i>add</i>  | DA -> DIN + NH3           | 3.5.4.4  |
| Adenine deaminase                          | 270 | <i>yicP</i> | AD -> NH3 + HYXN          | 3.5.4.2  |
| Inosine kinase                             | 271 | <i>gsk</i>  | INS + ATP -> IMP + ADP    | 2.7.1.73 |
| Guanosine kinase                           | 272 | <i>gsk</i>  | GSN + ATP -> GMP + ADP    | 2.7.1.73 |
| Adenosine kinase                           |     | <i>adk</i>  | ADN + ATP -> AMP + ADP    | 2.7.1.20 |
| Adenine phosphoryltransferase              | 273 | <i>apt</i>  | AD + PRPP -> PPI + AMP    | 2.4.2.7  |
| Xanthine-guanine phosphoribosyltransferase | 274 | <i>gpt</i>  | XAN + PRPP -> XMP + PPI   | 2.4.2.22 |
| Xanthine-guanine phosphoribosyltransferase | 275 | <i>gpt</i>  | HYXN + PRPP -> PPI + IMP  | 2.4.2.22 |
| Hypoxanthine phosphoribosyltransferase     | 645 | <i>hpt</i>  | HYXN + PRPP -> PPI + IMP  | 2.4.2.8  |
| Xanthine-guanine phosphoribosyltransferase | 276 | <i>gpt</i>  | GN + PRPP -> PPI + GMP    | 2.4.2.22 |
| Hypoxanthine phosphoribosyltransferase     | 646 | <i>hpt</i>  | GN + PRPP -> PPI + GMP    | 2.4.2.8  |
| Xanthosine phosphorylase                   | 277 | <i>xapA</i> | DIN + PI <-> HYXN + DR1P  | 2.4.2.1  |
| Purine nucleotide phosphorylase            | 647 | <i>deoD</i> | DIN + PI <-> HYXN + DR1P  | 2.4.2.1  |
| Xanthosine phosphorylase                   | 278 | <i>xapA</i> | DA + PI <-> AD + DR1P     | 2.4.2.1  |
| Purine nucleotide phosphorylase            | 648 | <i>deoD</i> | DA + PI <-> AD + DR1P     | 2.4.2.1  |
| Xanthosine phosphorylase                   | 279 | <i>xapA</i> | DG + PI <-> GN + DR1P     | 2.4.2.1  |
| Purine nucleotide phosphorylase            | 649 | <i>deoD</i> | DG + PI <-> GN + DR1P     | 2.4.2.1  |
| Xanthosine phosphorylase                   | 280 | <i>xapA</i> | HYXN + R1P <-> INS + PI   | 2.4.2.1  |
| Purine nucleotide phosphorylase            | 650 | <i>deoD</i> | HYXN + R1P <-> INS + PI   | 2.4.2.1  |
| Xanthosine phosphorylase                   | 281 | <i>xapA</i> | AD + R1P <-> PI + ADN     | 2.4.2.1  |
| Purine nucleotide phosphorylase            | 651 | <i>deoD</i> | AD + R1P <-> PI + ADN     | 2.4.2.1  |
| Xanthosine phosphorylase                   | 282 | <i>xapA</i> | GN + R1P <-> PI + GSN     | 2.4.2.1  |
| Purine nucleotide phosphorylase            | 652 | <i>deoD</i> | GN + R1P <-> PI + GSN     | 2.4.2.1  |
| Xanthosine phosphorylase                   | 283 | <i>xapA</i> | XAN + R1P <-> PI + XTSN   | 2.4.2.1  |
| Purine nucleotide phosphorylase            | 653 | <i>deoD</i> | XAN + R1P <-> PI + XTSN   | 2.4.2.1  |
| Uridine phosphorylase                      | 284 | <i>udp</i>  | URI + PI <-> URA + R1P    | 2.4.2.3  |
| Thymidine (deoxyuridine) phosphorylase     | 285 | <i>deoA</i> | DU + PI <-> URA + DR1P    | 2.4.2.4  |
| Purine nucleotide phosphorylase            | 654 | <i>deoD</i> | DU + PI <-> URA + DR1P    | 2.4.2.4  |
| Thymidine (deoxyuridine) phosphorylase     | 286 | <i>deoA</i> | DT + PI <-> THY + DR1P    | 2.4.2.4  |
| Cytidylate kinase                          | 287 | <i>cmkA</i> | DCMP + ATP <-> ADP + DCDP | 2.7.4.14 |
| Cytidylate kinase                          | 288 | <i>cmkA</i> | CMP + ATP <-> ADP + CDP   | 2.7.4.14 |
| Cytidylate kinase                          | 265 | <i>cmkB</i> | DCMP + ATP <-> ADP + DCDP | 2.7.4.14 |
| Cytidylate kinase                          | 261 | <i>cmkB</i> | CMP + ATP <-> ADP + CDP   | 2.7.4.14 |
| Cytidylate kinase                          | 729 | <i>cmkA</i> | UMP + ATP <-> ADP + UDP   | 2.7.4.14 |
| Cytidylate kinase                          | 730 | <i>cmkB</i> | UMP + ATP <-> ADP + UDP   | 2.7.4.14 |
| dTMP kinase                                | 289 | <i>tmk</i>  | DTMP + ATP <-> ADP + DTDP | 2.7.4.9  |
| Uridylate kinase                           | 290 | <i>pyrH</i> | UMP + ATP <-> UDP + ADP   | 2.1.4.-  |
| Uridylate kinase                           | 291 | <i>pyrH</i> | DUMP + ATP <-> DUDP + ADP | 2.1.4.-  |
| Thymidine (deoxyuridine) kinase            | 292 | <i>tdk</i>  | DU + ATP -> DUMP + ADP    | 2.7.1.21 |
| Uracil phosphoribosyltransferase           | 293 | <i>upp</i>  | URA + PRPP -> UMP + PPI   | 2.4.2.9  |
| Cytosine deaminase                         | 294 | <i>codA</i> | CYTS -> URA + NH3         | 3.5.4.1  |
| Uridine kinase                             | 295 | <i>udk</i>  | URI + GTP -> GDP + UMP    | 2.7.1.48 |
| Cytidine kinase                            | 296 | <i>udk</i>  | CYTD + GTP -> GDP + CMP   | 2.7.1.48 |
| CMP glycosylase                            | 297 |             | CMP -> CYTS + R5P         | 3.2.2.10 |
| Cytidine deaminase                         | 298 | <i>cdd</i>  | CYTD -> URI + NH3         | 3.5.4.5  |
| Thymidine (deoxyuridine) kinase            | 299 | <i>tdk</i>  | DT + ATP -> ADP + DTMP    | 2.7.1.21 |

|                                                |     |              |                             |          |
|------------------------------------------------|-----|--------------|-----------------------------|----------|
| dCTP deaminase                                 | 300 | <i>dcd</i>   | DCTP -> DUTP + NH3          | 3.5.4.13 |
| Cytidine deaminase                             | 301 | <i>cdd</i>   | DC -> NH3 + DU              | 3.5.4.5  |
| 5'-Nucleotidase                                | 302 | <i>ushA</i>  | DUMP -> DU + PI             | 3.1.3.5  |
| 5'-Nucleotidase                                | 303 | <i>ushA</i>  | DTMP -> DT + PI             | 3.1.3.5  |
| 5'-Nucleotidase                                | 304 | <i>ushA</i>  | DAMP -> DA + PI             | 3.1.3.5  |
| 5'-Nucleotidase                                | 305 | <i>ushA</i>  | DGMP -> DG + PI             | 3.1.3.5  |
| 5'-Nucleotidase                                | 306 | <i>ushA</i>  | DCMP -> DC + PI             | 3.1.3.5  |
| 5'-Nucleotidase                                | 307 | <i>ushA</i>  | CMP -> CYTD + PI            | 3.1.3.5  |
| 5'-Nucleotidase                                | 308 | <i>ushA</i>  | AMP -> PI + ADN             | 3.1.3.5  |
| 5'-Nucleotidase                                | 309 | <i>ushA</i>  | GMP -> PI + GSN             | 3.1.3.5  |
| 5'-Nucleotidase                                | 310 | <i>ushA</i>  | IMP -> PI + INS             | 3.1.3.5  |
| 5'-Nucleotidase                                | 311 | <i>ushA</i>  | XMP -> PI + XTSN            | 3.1.3.5  |
| 5'-Nucleotidase                                | 312 | <i>ushA</i>  | UMP -> PI + URI             | 3.1.3.5  |
| Ribonucleoside-diphosphate reductase           | 313 | <i>nrdAB</i> | ADP + RTHIO -> DADP + OTHIO | 1.17.4.1 |
| Ribonucleoside-diphosphate reductase           | 314 | <i>nrdAB</i> | GDP + RTHIO -> DGDP + OTHIO | 1.17.4.1 |
| Ribonucleoside-triphosphate reductase          | 315 | <i>nrdD</i>  | ATP + RTHIO -> DATP + OTHIO | 1.17.4.2 |
| Ribonucleoside-triphosphate reductase          | 316 | <i>nrdD</i>  | GTP + RTHIO -> DGTP + OTHIO | 1.17.4.2 |
| Ribonucleoside-diphosphate reductase           | 317 | <i>nrdAB</i> | CDP + RTHIO -> DCDP + OTHIO | 1.17.4.1 |
| Ribonucleoside-diphosphate reductase II        | 655 | <i>nrdEF</i> | CDP + RTHIO -> DCDP + OTHIO |          |
| Ribonucleoside-diphosphate reductase           | 318 | <i>nrdAB</i> | UDP + RTHIO -> DUDP + OTHIO | 1.17.4.1 |
| Ribonucleoside-triphosphate reductase          | 319 | <i>nrdD</i>  | CTP + RTHIO -> DCTP + OTHIO | 1.17.4.2 |
| Ribonucleoside-triphosphate reductase          | 320 | <i>nrdD</i>  | UTP + RTHIO -> OTHIO + DUTP | 1.17.4.2 |
| dUTP pyrophosphatase                           | 321 | <i>dut</i>   | DUTP -> PPI + DUMP          | 3.6.1.23 |
| Thymidilate synthetase                         | 322 | <i>thyA</i>  | DUMP + METTHF -> DHF + DTMP | 2.1.1.45 |
| Nucleoside triphosphatase                      | 595 | <i>mutT</i>  | GTP -> GSN + 3 PI           | 3.6.1.-  |
| Nucleoside triphosphatase                      | 596 | <i>mutT</i>  | DGTP -> DG + 3 PI           | 3.6.1.-  |
| Deoxyguanosinetriphosphate triphosphohydrolase | 597 | <i>dgt</i>   | DGTP -> DG + 3 PI           | 3.1.5.1  |
| Deoxyguanosinetriphosphate triphosphohydrolase | 598 | <i>dgt</i>   | GTP -> GSN + 3 PI           | 3.1.5.1  |

#### One Carbon Metabolism

|                                                  |     |                     |                                              |                                           |
|--------------------------------------------------|-----|---------------------|----------------------------------------------|-------------------------------------------|
| Glycine cleavage system (Multi-component system) | 323 | <i>gcvHTP, lpdA</i> | GLY + THF + NAD -> METTHF + NADH + CO2 + NH3 | Multi-Component System: 1.4.4.2, 2.1.2.10 |
| Formyl tetrahydrofolate deformylase              | 325 | <i>purU</i>         | FTHF -> FOR + THF                            | 3.5.1.10                                  |
| Methylene tetrahydrofolate reductase             | 326 | <i>metF</i>         | METTHF + NADH -> NAD + MTHF                  | 1.7.99.5                                  |
| Methylene THF dehydrogenase                      | 327 | <i>folD</i>         | METTHF + NADP <-> METHF + NADPH              | 1.5.1.5                                   |
| Methenyl tetrahydrofolate cyclehydrase           | 328 | <i>folD</i>         | METHF <-> FTHF                               | 3.5.4.9                                   |

#### Membrane Lipid Biosynthesis

|                                              |     |               |                                                                                               |                   |
|----------------------------------------------|-----|---------------|-----------------------------------------------------------------------------------------------|-------------------|
| Acetyl-CoA carboxyltransferase               | 330 | <i>accABD</i> | ACCOA + ATP + CO2 <-> MALCOA + ADP + PI                                                       | 6.4.1.2, 6.3.4.14 |
| Malonyl-CoA-ACP transacylase                 | 331 | <i>fabD</i>   | MALCOA + ACP <-> MALACP + COA                                                                 | 2.3.1.39          |
| Malonyl-ACP decarboxylase                    | 332 | <i>fadB</i>   | MALACP -> ACACP + CO2                                                                         | 2.3.1.41          |
| Acetyl-CoA-ACP transacylase                  | 333 | <i>fabH</i>   | ACACP + COA <-> ACCOA + ACP                                                                   | 2.3.1.41          |
| β-Ketoacyl-ACP synthase (C12,0)              |     | <i>fab</i>    | ACACP +5 MALACP +10 NADPH -> 10 NADP + C120ACP +5 CO2 +5 ACP                                  |                   |
| β-Ketoacyl-ACP synthase (C14,0)              |     | <i>fab</i>    | ACACP +6 MALACP +12 NADPH -> 12 NADP + C140ACP +6 CO2 +6 ACP                                  |                   |
| β-Ketoacyl-ACP synthase I (C14,1)            |     | <i>fab</i>    | ACACP +6 MALACP +11 NADPH -> 11 NADP + C141ACP +6 CO2 +6 ACP                                  |                   |
| β-Ketoacyl-ACP synthase I (C16,0)            |     | <i>fab</i>    | ACACP +7 MALACP +14 NADPH -> 14 NADP + C160ACP +7 CO2 +7 ACP                                  |                   |
| β-Ketoacyl-ACP synthase I (C16,1)            |     | <i>fab</i>    | ACACP +7 MALACP +13 NADPH -> 13 NADP + C161ACP +7 CO2 +7 ACP                                  |                   |
| β-Ketoacyl-ACP synthase I (C18,1)            |     | <i>fab</i>    | ACACP +8 MALACP +15 NADPH -> 15 NADP +1 C181ACP +8 CO2 +8 ACP                                 |                   |
| Glycerol-3-phosphate dehydrogenase           | 341 | <i>gpsA</i>   | NADPH + T3P2 <-> GL3P + NADP                                                                  | 1.1.1.94          |
| Acyltransferase                              |     | <i>pls</i>    | GL3P +0.035 C140ACP +0.102 C141ACP +0.717 C160ACP +0.142 C161ACP +1.004 C181ACP -> 2 ACP + PA |                   |
| CDP-Diacylglycerol synthetase                | 344 | <i>cdsA</i>   | PA + CTP <-> CDPDG + PPI                                                                      | 2.7.7.41          |
| CDP-Diacylglycerol pyrophosphatase           | 600 | <i>cdh</i>    | CDPDG -> CMP + PA                                                                             | 3.6.1.26          |
| Phosphatidylserine synthase                  | 345 | <i>psaA</i>   | CDPDG + SER <-> CMP + PS                                                                      | 2.7.8.8           |
| Phosphatidylserine decarboxylase             | 346 | <i>psd</i>    | PS -> PE + CO2                                                                                | 4.1.1.65          |
| Phosphatidylglycerol phosphate synthase      | 347 | <i>pgsA</i>   | CDPDG + GL3P <-> CMP + PGP                                                                    | 2.7.8.5           |
| Phosphatidylglycerol phosphate phosphatase A | 348 | <i>pgpA</i>   | PGP -> PI + PG                                                                                | 3.1.3.27          |
| Phosphatidylglycerol phosphate phosphatase B | 708 | <i>pgpB</i>   | PGP -> PI + PG                                                                                | 3.1.3.27          |

|                                                              |                        |                   |                                                                       |           |
|--------------------------------------------------------------|------------------------|-------------------|-----------------------------------------------------------------------|-----------|
| Cardiolipin synthase                                         | 349                    | <i>cls</i>        | 2 PG <-> CL + GL                                                      | 2.7.8.?   |
| <b>Fatty Acid Metabolism</b>                                 |                        |                   |                                                                       |           |
| Acetyl-CoA C-acetyltransferase                               | 606                    | <i>atoB</i>       | 2 ACCOA <-> COA + AACCOA                                              | 2.3.1.9   |
| $\beta$ -Ketoacyl-ACP synthase (C14,0)                       |                        | <i>fab</i>        | C140 + ATP +7 COA +7 FAD +7 NAD -> AMP + PPI +7 FADH +7 NADH +7 ACCOA |           |
| $\beta$ -Ketoacyl-ACP synthase I (C14,1)                     |                        | <i>fab</i>        | C160 + ATP +8 COA +8 FAD +8 NAD -> AMP + PPI +8 FADH +8 NADH +8 ACCOA |           |
| $\beta$ -Ketoacyl-ACP synthase I (C16,0)                     |                        | <i>fab</i>        | C180 + ATP +9 COA +9 FAD +9 NAD -> AMP + PPI +9 FADH +9 NADH +9 ACCOA |           |
| <b>Isoprenoid Biosynthesis</b>                               |                        |                   |                                                                       |           |
| Isoprenyl-pyrophosphate synthesis pathway                    | 350 (657-663)          |                   | T3P1 + PYR + 2 NADPH + ATP -> IPPP + ADP + 2 NADP + CO2               | 8 rxns    |
| Isoprenyl pyrophosphate isomerase                            | 351                    |                   | IPPP -> DMPP                                                          | 5.3.3.2   |
| Farnesyl pyrophosphate synthetase                            | 352                    | <i>ispA</i>       | DMPP + IPPP -> GPP + PPI                                              | 2.5.1.1   |
| Geranyltranstransferase                                      | 353                    | <i>ispA</i>       | GPP + IPPP -> FPP + PPI                                               | 2.5.1.10  |
| Octaprenyl pyrophosphate synthase (5 reactions)              | 354(664- <i>ispB</i> ) |                   | 5 IPPP + FPP -> OPP + 5 PPI                                           | 2.5.1.-   |
| Undecaprenyl pyrophosphate synthase (8 reactions)            | 355(668-675)           |                   | 8 IPPP + FPP -> UDPP + 8 PPI                                          | 2.5.1.31  |
| <b>Quinone Biosynthesis</b>                                  |                        |                   |                                                                       |           |
| <i>Ubiquinone</i>                                            |                        |                   |                                                                       |           |
| Chorismate pyruvate-lyase                                    | 356                    | <i>ubiC</i>       | CHOR -> 4HBZ + PYR                                                    | 4.1.3.27  |
| Hydroxybenzoate octaprenyltransferase                        | 357                    | <i>ubiA</i>       | 4HBZ + OPP -> O4HBZ + PPI                                             | 2.5.1.-   |
| Octaprenyl-hydroxybenzoate decarboxylase                     | 358                    | <i>ubiD, ubiX</i> | O4HBZ -> CO2 + 2OPPP                                                  | 4.1.1.-   |
| 2-Octaprenylphenol hydroxylase                               | 359                    | <i>ubiB</i>       | 2OPPP + O2 -> 2O6H                                                    | 1.13.14.- |
| Methylation reaction                                         | 361                    |                   | 2O6H + SAM -> 2OPMP + SAH                                             | 2.1.1.-   |
| 2-Octaprenyl-6-methoxyphenol hydroxylase                     | 362                    | <i>ubiH</i>       | 2OPMP + O2 -> 2OPMB                                                   | 1.14.3.-  |
| 2-Octaprenyl-6-methoxy-1,4-benzoquinone methylase            | 364                    | <i>ubiE</i>       | 2OPMB + SAM -> 2OPMMB + SAH                                           | 2.1.1.-   |
| 2-Octaprenyl-3-methyl-6-methoxy-1,4-benzoquinone hydroxylase | 365                    | <i>ubiF</i>       | 2OPMMB + O2 -> 2OMHMB                                                 | 1.14.13.- |
| 3-Dimethylubiquinone 3-methyltransferase                     | 367                    | <i>ubiG</i>       | 2OMHMB + SAM -> QH2 + SAH                                             | 2.1.1.64  |
| <i>Menaquinone</i>                                           |                        |                   |                                                                       |           |
| Isochorismate synthase 1                                     | 368                    | <i>menF</i>       | CHOR -> ICHOR                                                         | 5.4.99.6  |
| $\alpha$ -Ketoglutarate decarboxylase                        | 369                    | <i>menD</i>       | AKG + TPP -> SSALTTPP + CO2                                           | 4.1.1.71  |
| SHCHC synthase                                               | 370                    | <i>menD</i>       | ICHOR + SSALTTPP -> PYR + TPP + SHCHC                                 |           |
| O-Succinylbenzoate-CoA synthase                              | 371                    | <i>menC</i>       | SHCHC -> OSB                                                          |           |
| O-Succinylbenzoic acid-CoA ligase                            | 372                    | <i>menE</i>       | OSB + ATP + COA -> OSBCOA + AMP + PPI                                 | 6.2.1.26  |
| Naphthoate synthase                                          | 373                    | <i>menB</i>       | OSBCOA -> DHNA + COA                                                  | 4.1.3.36  |
| 1,4-Dihydroxy-2-naphthoate octaprenyltransferase             | 374                    | <i>menA</i>       | DHNA + OPP -> DMK + PPI + CO2                                         |           |
| S-Adenosylmethionine-2-DMK methyltransferase                 | 375                    | <i>menG</i>       | DMK + SAM -> MK + SAH                                                 |           |
| <b>Enterochelin Biosynthesis</b>                             |                        |                   |                                                                       |           |
| Isochorismate synthase 2                                     | 607                    | <i>entC</i>       | CHOR -> ICHOR                                                         | 5.4.99.6  |
| Isochorismatase                                              | 608                    | <i>entB</i>       | ICHOR <-> 23DHDHB + PYR                                               | 3.3.2.1   |
| 2,3-Dihydro-2,3-dihydroxybenzoate dehydrogenase              | 609                    | <i>entA</i>       | 23DHDHB + NAD <-> 23DHB + NADH                                        | 1.3.1.28  |
| ATP-dependent activation of 2,3-dihydroxybenzoate            | 610                    | <i>entE</i>       | 23DHB + ATP <-> 23DHBA + PPI                                          | 6.-.-     |
| ATP-dependent serine activating enzyme                       | 611                    | <i>entF</i>       | SER + ATP <-> SERA + PPI                                              | 2.7.7.-   |
| Enterochelin synthetase                                      | 612                    | <i>entD</i>       | 3 SERA +3 23DHBA -> ENTER +6 AMP                                      | 6.-.-     |
| <b>Riboflavin Biosynthesis</b>                               |                        |                   |                                                                       |           |
| GTP cyclohydrolase II                                        | 376                    | <i>ribA</i>       | GTP -> D6RP5P + FOR + PPI                                             | 3.5.4.25  |
| Pyrimidine deaminase                                         | 377                    | <i>ribD</i>       | D6RP5P -> A6RP5P + NH3                                                | 3.5.4.26  |
| Pyrimidine reductase                                         | 378                    | <i>ribD</i>       | A6RP5P + NADPH -> A6RP5P2 + NADP                                      | 1.1.1.193 |
| Pyrimidine phosphatase                                       | 379                    |                   | A6RP5P2 -> A6RP + PI                                                  |           |
| 3,4 Dihydroxy-2-butanone-4-phosphate synthase                | 380                    | <i>ribB</i>       | RL5P -> DB4P + FOR                                                    |           |
| 6,7-Dimethyl-8-ribityllumazine synthase                      | 381                    | <i>ribE</i>       | DB4P + A6RP -> D8RL + PI                                              |           |
| Riboflavin synthase                                          | 382                    | <i>ribH</i>       | 2 D8RL -> RIBFLV + A6RP                                               | 2.5.1.9   |
| Riboflavin kinase                                            | 383                    | <i>ribF</i>       | RIBFLV + ATP -> FMN + ADP                                             | 2.7.1.26  |
| FAD synthetase                                               | 384                    | <i>ribF</i>       | FMN + ATP -> FAD + PPI                                                | 2.7.7.2   |
| <b>Folate Biosynthesis</b>                                   |                        |                   |                                                                       |           |
| GTP cyclohydrolase I                                         | 385                    | <i>folE</i>       | GTP -> FOR + AHTD                                                     | 3.5.4.16  |
| Dihydroneopterin triphosphate pyrophosphorylase              | 386                    | <i>ntpA</i>       | AHTD -> PPI + DHPP                                                    | 3.6.1.-   |
| Nucleoside triphosphatase                                    | 676                    | <i>mutT</i>       | AHTD -> DHP +3 PI                                                     | 3.1.3.1   |
| Dihydroneopterin monophosphate dephosphorylase               | 360                    |                   | DHPP -> DHP + PI                                                      | 3.6.1.-   |
| Dihydroneopterin aldolase                                    | 387                    | <i>folB</i>       | DHP -> AHHMP + GLAL                                                   | 4.1.2.25  |
| 6-Hydroxymethyl-7,8 dihydropterin pyrophosphokinase          | 388                    | <i>folK</i>       | AHHMP + ATP -> AMP + AHHMD                                            | 2.7.6.3   |
| Aminodeoxychorismate synthase                                | 389                    | <i>pabAB</i>      | CHOR + GLN -> ADCHOR + GLU                                            | 4.1.3.-   |

|                                                            |     |              |                                           |           |
|------------------------------------------------------------|-----|--------------|-------------------------------------------|-----------|
| Aminodeoxychorismate lyase                                 | 390 | <i>pabC</i>  | ADCHOR -> PYR + PABA                      | 4.-.-     |
| Dihydropteroate synthase                                   | 391 | <i>folP</i>  | PABA + AHHMD -> PPI + DHPT                | 2.5.1.15  |
| Dihydrofolate synthetase                                   | 392 | <i>folC</i>  | DHPT + ATP + GLU -> ADP + PI + DHF        | 6.3.2.12  |
| Dihydrofolate reductase                                    | 393 | <i>folA</i>  | DHF + NADPH -> NADP + THF                 | 1.5.1.3   |
| <b>Coenzyme A Biosynthesis</b>                             |     |              |                                           |           |
| Ketopantoate hydroxymethyl transferase                     | 394 | <i>panB</i>  | OIVAL + METTHF -> AKP + THF               | 2.1.2.11  |
| Ketopantoate reductase                                     | 395 | <i>panE</i>  | AKP + NADPH -> NADP + PANT                | 1.1.1.169 |
| Acetohydroxyacid isomeroreductase                          | 396 | <i>ilvC</i>  | AKP + NADPH -> NADP + PANT                | 1.1.1.86  |
| Aspartate decarboxylase                                    | 397 | <i>panD</i>  | ASP -> CO2 + bALA                         | 4.1.1.11  |
| Pantoate-β-alanine ligase                                  | 398 | <i>panC</i>  | PANT + bALA + ATP -> AMP + PPI + PNT0     | 6.3.2.1   |
| Pantothenate kinase                                        | 399 | <i>coaA</i>  | PNT0 + ATP -> ADP + 4PPNT0                | 2.7.1.33  |
| Phosphopantothenate-cysteine ligase                        | 400 |              | 4PPNT0 + CTP + CYS -> CMP + PPI + 4PPNCYS | 6.3.2.5   |
| Phosphopantothenate-cysteine decarboxylase                 | 401 |              | 4PPNCYS -> CO2 + 4PPNTE                   | 4.1.1.36  |
| Phospho-pantethiene adenyltransferase                      | 402 |              | 4PPNTE + ATP -> PPI + DPCOA               | 2.7.7.3   |
| DephosphoCoA kinase                                        | 403 |              | DPCOA + ATP -> ADP + COA                  | 2.7.1.24  |
| ACP Synthase                                               | 404 | <i>acpS</i>  | COA -> PAP + ACP                          | 2.7.8.7   |
| <b>NAD Biosynthesis</b>                                    |     |              |                                           |           |
| Aspartate oxidase                                          | 405 | <i>nadB</i>  | ASP + FAD -> FADH + ISUCC                 | 1.4.3.-   |
| Quinolinate synthase                                       | 406 | <i>nadA</i>  | ISUCC + T3P2 -> PI + QA                   | 1.4.3.16  |
| Quinolinate phosphoribosyl transferase                     | 407 | <i>nadC</i>  | QA + PRPP -> NAMN + CO2 + PPI             | 2.4.2.19  |
| NAMN adenyl transferase                                    | 408 | <i>nadD</i>  | NAMN + ATP -> PPI + NAAD                  | 2.7.7.18  |
| NAMN adenyl transferase                                    | 409 | <i>nadE</i>  | NMN + ATP -> NAD + PPI                    | 2.7.7.18  |
| Deamido-NAD ammonia ligase                                 | 410 | <i>nadE</i>  | NAAD + ATP + NH3 -> NAD + AMP + PPI       | 6.3.5.1   |
| NAD kinase                                                 | 411 | <i>nadFG</i> | NAD + ATP -> NADP + ADP                   | 2.7.1.23  |
| NADP phosphatase                                           | 412 |              | NADP -> NAD + PI                          | 3.1.2.-   |
| <b>PNC IV</b>                                              |     |              |                                           |           |
| DNA ligase                                                 | 413 | <i>lig</i>   | NAD -> NMN + AMP                          | 6.5.1.2   |
| NMN amidohydrolase                                         | 415 | <i>pncC</i>  | NMN -> NAMN + NH3                         | 3.5.1.42  |
| <b>PNC VI</b>                                              |     |              |                                           |           |
| NMN glycohydrolase (cytoplasmic)                           | 416 |              | NMN -> R5P + NAm                          | 3.2.2.14  |
| NAm amidohydrolase                                         | 417 | <i>pncA</i>  | NAm -> NAC + NH3                          | 3.5.1.19  |
| NAPRTase                                                   | 418 | <i>pncB</i>  | NAC + PRPP + ATP -> NAMN + PPI + PI + ADP | 2.4.2.11  |
| <b>Uptake Pathways</b>                                     |     |              |                                           |           |
| NAD pyrophosphatase                                        | 681 | <i>pnuE</i>  | NADxt -> NMNxt + AMPxt                    | 3.6.1.22  |
| NMN permease                                               | 682 | <i>pnuC</i>  | NMNxt -> NMN                              |           |
| NMN glycohydrolase (membrane bound)                        | 683 |              | NMNxt -> R5P + NAm                        | 3.2.2.14  |
| Nicotinic acid uptake                                      | 684 |              | NACxt -> NAC                              |           |
| <b>Tetrapyrrole Biosynthesis</b>                           |     |              |                                           |           |
| GSA synthetase                                             | 419 | <i>hemM</i>  | GLU + ATP -> GTRNA + AMP + PPI            | 6.1.1.17  |
| Glutamyl-tRNA synthetase                                   | 677 | <i>gltX</i>  | GLU + ATP -> GTRNA + AMP + PPI            | 6.1.1.17  |
| Glutamyl-tRNA reductase                                    | 420 | <i>hemA</i>  | GTRNA + NADPH -> GSA + NADP               | 1.2.1.-   |
| Glutamate-1-semialdehyde aminotransferase                  | 421 | <i>hemL</i>  | GSA -> ALAV                               | 5.4.3.8   |
| Porphobilinogen synthase                                   | 422 | <i>hemB</i>  | 8 ALAV -> 4 PBG                           | 4.2.1.24  |
| Hydroxymethylbilane synthase                               | 423 | <i>hemC</i>  | 4 PBG -> HMB + 4 NH3                      | 4.1.3.8   |
| Uroporphyrinogen III synthase                              | 424 | <i>hemD</i>  | HMB -> UPRG                               | 4.2.1.75  |
| Uroporphyrin-III C-methyltransferase 1                     | 709 | <i>hemX</i>  | SAM + UPRG -> SAH + PC2                   | 2.1.1.107 |
| Uroporphyrin-III C-methyltransferase 2                     | 425 | <i>cysG</i>  | SAM + UPRG -> SAH + PC2                   | 2.1.1.107 |
| 1,3-Dimethyluroporphyrinogen III dehydrogenase             | 426 | <i>cysG</i>  | PC2 + NAD -> NADH + SHCL                  |           |
| Siroheme ferrochelatase                                    | 427 | <i>cysG</i>  | SHCL -> SHEME                             | 4.99.1.-  |
| Uroporphyrinogen decarboxylase                             | 428 | <i>hemE</i>  | UPRG -> 4 CO2 + CPP                       | 4.1.1.37  |
| Coproporphyrinogen oxidase, aerobic                        | 429 | <i>hemF</i>  | O2 + CPP -> 2 CO2 + PPHG                  | 1.3.3.3   |
| Protoporphyrinogen oxidase                                 | 430 | <i>hemG</i>  | O2 + PPHG -> PPIX                         | 1.3.3.4   |
| Ferrochelatase                                             | 431 | <i>hemH</i>  | PPIX -> PTH                               | 4.99.1.1  |
| Heme O synthase                                            | 432 | <i>cyoE</i>  | PTH + FPP -> HO + PPI                     |           |
| <b>Biotin Biosynthesis</b>                                 |     |              |                                           |           |
| 8-Amino-7-oxononanoate synthase                            | 433 | <i>bioF</i>  | ALA + CHCOA <-> CO2 + COA + AONA          | 2.3.1.47  |
| Adenosylmethionine-8-amino-7-oxononanoate aminotransferase | 434 | <i>bioA</i>  | SAM + AONA <-> SAMOB + DANNA              | 2.6.1.62  |
| Dethiobiotin synthase                                      | 435 | <i>bioD</i>  | CO2 + DANNA + ATP <-> DTB + PI + ADP      | 6.3.3.3   |
| Biotin synthase                                            | 436 | <i>bioB</i>  | DTB + CYS <-> BT                          | 2.8.1.-   |
| <b>Glutathione Biosynthesis</b>                            |     |              |                                           |           |
| Glutamate-cysteine ligase                                  | 437 | <i>gshA</i>  | CYS + GLU + ATP -> GC + PI + ADP          | 6.3.2.2   |
| Glutathione synthase                                       | 438 | <i>gshB</i>  | GLY + GC + ATP -> RGT + PI + ADP          | 6.3.2.3   |
| Glutathione reductase                                      | 613 | <i>gor</i>   | NADPH + OGT <-> NADP + RGT                | 1.6.4.2   |

**Thiamin (Vitamin B1) Biosynthesis**

|                            |     |             |                                    |          |
|----------------------------|-----|-------------|------------------------------------|----------|
| thiC protein               | 439 | <i>thiC</i> | AIR -> AHM                         |          |
| HMP kinase                 | 440 | <i>thiN</i> | AHM + ATP -> AHMP + ADP            | 2.7.1.49 |
| HMP-phosphate kinase       | 441 | <i>thiD</i> | AHMP + ATP -> AHMPP + ADP          | 2.7.4.7  |
| Hypothetical               | 442 |             | T3P1 + PYR -> DTP                  |          |
| thiG protein               | 443 | <i>thiG</i> | DTP + TYR + CYS -> THZ + HBA + CO2 |          |
| thiE protein               | 710 | <i>thiE</i> | DTP + TYR + CYS -> THZ + HBA + CO2 |          |
| thiF protein               | 711 | <i>thiF</i> | DTP + TYR + CYS -> THZ + HBA + CO2 |          |
| thiH protein               | 712 | <i>thiH</i> | DTP + TYR + CYS -> THZ + HBA + CO2 |          |
| THZ kinase                 | 444 | <i>thiM</i> | THZ + ATP -> THZP + ADP            | 2.7.1.50 |
| Thiamin phosphate synthase | 445 | <i>thiB</i> | THZP + AHMPP -> THMP + PPI         | 2.5.1.3  |
| Thiamin kinase             | 446 | <i>thiK</i> | THMP + ADP <-> THIAMIN + ATP       | 2.7.1.89 |
| Thiamin phosphate kinase   | 447 | <i>thiL</i> | THMP + ATP <-> TPP + ADP           | 2.7.4.16 |

**Vitamin B6 (Pyridoxine) Biosynthesis**

|                                                      |     |              |                                  |          |
|------------------------------------------------------|-----|--------------|----------------------------------|----------|
| Erythrose 4-phosphate dehydrogenase                  | 448 | <i>epd</i>   | E4P + NAD <-> ER4P + NADH        | 1.1.1.-  |
| Erythronate-4-phosphate dehydrogenase                | 449 | <i>pdxB</i>  | ER4P + NAD <-> OHB + NADH        | 1.1.1.-  |
| Hypothetical transaminase/phosphoserine transaminase | 450 | <i>serC</i>  | OHB + GLU <-> PHT + AKG          | 2.6.1.52 |
| Pyridoxal-phosphate biosynthetic proteins pdxJ-pdxA  | 451 | <i>pdxAJ</i> | PHT + DX5P -> P5P + CO2          | 4.2.99.2 |
| Pyridoxine 5'-phosphate oxidase                      | 452 | <i>pdxH</i>  | P5P + O2 <-> PL5P + H2O2         | 1.4.3.5  |
| Threonine synthase                                   | 453 | <i>thrC</i>  | PHT -> 4HLT + PI                 | 4.2.99.2 |
| Hypothetical Enzyme                                  | 454 |              | 4HLT -> PYRDX                    | 4.1.1.-  |
| Pyridoxine kinase                                    | 455 | <i>pdxK</i>  | PYRDX + ATP -> P5P + ADP         | 2.7.1.35 |
| Hypothetical Enzyme                                  | 456 |              | P5P -> PYRDX + PI                | 3.1.3.-  |
| Hypothetical Enzyme                                  | 457 |              | PL5P -> PL + PI                  | 3.1.3.-  |
| Pyridoxine kinase                                    | 458 | <i>pdxK</i>  | PL + ATP -> PL5P + ADP           | 2.7.1.35 |
| Pyridoxine 5'-phosphate oxidase                      | 459 | <i>pdxH</i>  | PYRDX + O2 <-> PL + H2O2         | 1.4.3.5  |
| Pyridoxine 5'-phosphate oxidase                      | 460 | <i>pdxH</i>  | PL + O2 + NH3 <-> PDLA + H2O2    | 1.4.3.5  |
| Pyridoxine kinase                                    | 461 | <i>pdxK</i>  | PDLA + ATP -> PDLA5P + ADP       | 2.7.1.35 |
| Hypothetical Enzyme                                  | 462 |              | PDLA5P -> PDLA + PI              | 3.1.3.-  |
| Pyridoxine 5'-phosphate oxidase                      | 463 | <i>pdxH</i>  | PDLA5P + O2 -> PL5P + H2O2 + NH3 | 1.4.3.5  |
| Serine hydroxymethyltransferase (serine methylase)   | 464 | <i>glyA</i>  | PL5P + GLU -> PDLA5P + AKG       | 2.1.2.1  |
| Serine hydroxymethyltransferase (serine methylase)   | 465 | <i>glyA</i>  | PL5P + ALA -> PDLA5P + PYR       | 2.1.2.1  |

**Cell Envelope Biosynthesis**

|                                                     |     |             |                                          |          |
|-----------------------------------------------------|-----|-------------|------------------------------------------|----------|
| Glutamine fructose-6-phosphate Transaminase         | 466 | <i>glmS</i> | F6P + GLN -> GLU + GA6P                  | 2.6.1.16 |
| Phosphoglucosamine mutase                           | 467 | <i>glmM</i> | GA6P <-> GA1P                            |          |
| N-Acetylglucosamine-1-phosphate-uridylyltransferase | 468 | <i>glmU</i> | UTP + GA1P + ACCOA -> UDPNAG + PPI + COA | 2.7.7.23 |

**Lipid A biosynthesis**

|                                                                |     |                   |                                             |           |
|----------------------------------------------------------------|-----|-------------------|---------------------------------------------|-----------|
| UDP-N-acetylglucosamine acyltransferase                        | 469 | <i>lpxA</i>       | C140ACP + UDPNAG -> ACP + UDPG2AA           | 2.3.1.129 |
| UDP-3-O-acyl-N-acetylglucosamine deacetylase                   | 470 | <i>lpxC</i>       | UDPG2AA -> UDPG2A + AC                      | 3.5.1.-   |
| UDP-3-O-(3-hydroxymyristoyl)glucosamine-acyltransferase        | 471 | <i>lpxD</i>       | UDPG2A + C140ACP -> ACP + UDPG23A           | 2.3.1.-   |
| UDP-sugar hydrolase                                            | 472 | <i>ushA</i>       | UDPG23A -> UMP + LIPX                       | 3.6.1.45  |
| Lipid A disaccharide synthase                                  | 473 | <i>lpxB</i>       | LIPX + UDPG23A -> UDP + DISAC1P             | 2.4.1.182 |
| Tetraacyldisaccharide 4' kinase                                | 474 |                   | DISAC1P + ATP -> ADP + LIPIV                | 2.7.1.130 |
| 3-Deoxy-D-manno-octulosonic-acid transferase (KDO transferase) | 475 | <i>kdtA</i>       | LIPIV + CMPKDO -> KDOLIPIV + CMP            | 2.-.-.-   |
| 3-Deoxy-D-manno-octulosonic-acid transferase (KDO transferase) | 476 | <i>kdtA</i>       | KDOLIPIV + CMPKDO -> K2LIPIV + CMP          |           |
| Endotoxin synthase                                             | 477 | <i>htrB, msbB</i> | K2LIPIV + C140ACP + C120ACP -> LIPA + 2 ACP |           |

**LPS sugar biosynthesis**

|                                                          |     |                    |                                                                                       |           |
|----------------------------------------------------------|-----|--------------------|---------------------------------------------------------------------------------------|-----------|
| 3-Deoxy-D-manno-octulosonic-acid 8-phosphate synthase    | 478 | <i>kdsA</i>        | PEP + A5P -> KDOP + PI                                                                | 4.1.2.16  |
| 3-Deoxy-D-manno-octulosonic-acid 8-phosphate phosphatase | 363 |                    | KDOP -> KDO + PI                                                                      | 3.1.3.45  |
| CMP-2-keto-3-deoxyoctonate synthesis                     | 479 | <i>kdsB</i>        | KDO + CTP -> PPI + CMPKDO                                                             | 2.7.7.38  |
| ADP-L-glycero-D-mannoheptose-6-epimerase                 | 480 | <i>lpcA, rfaED</i> | S7P + ATP -> ADPHEP + PPI                                                             |           |
| UDP glucose-1-phosphate uridylyltransferase              | 481 | <i>galU, galF</i>  | G1P + UTP -> PPI + UDPG                                                               | 2.7.7.9   |
| Ethanolamine phosphotransferase                          | 482 |                    | PE + CMP <-> CDPETN + DGR                                                             |           |
| Phosphatidate phosphatase                                | 483 |                    | PA -> PI + DGR                                                                        |           |
| Diacylglycerol kinase                                    | 484 | <i>dgkA</i>        | DGR + ATP -> ADP + PA                                                                 | 2.7.1.107 |
| LPS Synthesis – truncated version of LPS (ref neid)      | 485 | <i>rfaLJIGF C</i>  | LIPA + 3 ADPHEP + 2 UDPG + 2 CDPETN + 3 CMPKDO -> LPS + 3 ADP + 2 UDP + 3 CMP + 2 CDP |           |

**Murein biosynthesis**

|                                                    |     |             |                                          |           |
|----------------------------------------------------|-----|-------------|------------------------------------------|-----------|
| UDP-N-acetylglucosamine-enolpyruvate transferase   | 486 | <i>murA</i> | UDPNAG + PEP -> UDPNAGEP + PI            | 2.5.1.7   |
| UDP-N-acetylglucosamine-enolpyruvate dehydrogenase | 487 | <i>murB</i> | UDPNAGEP + NADPH -> UDPNAM + NADP        | 1.1.1.158 |
| UDP-N-acetylmuramate-alanine ligase                | 488 | <i>murC</i> | UDPNAM + ALA + ATP -> ADP + PI + UDPNAMA | 6.3.2.8   |

|                                                                 |     |              |                                             |          |
|-----------------------------------------------------------------|-----|--------------|---------------------------------------------|----------|
| UDP-N-acetylmuramoylalanine-D-glutamate ligase                  | 489 | <i>murD</i>  | UDPNAMA + DGLU + ATP -> UDPNAMAG + ADP + PI | 6.3.2.9  |
| UDP-N-acetylmuramoylanyl-D-glutamate 2,6-diaminopimelate ligase | 490 | <i>murE</i>  | UDPNAMAG + ATP + MDAP -> UNAGD + ADP + PI   | 6.3.2.13 |
| D-Alanine-D-alanine adding enzyme                               | 491 | <i>murF</i>  | UNAGD + ATP + AA -> UNAGDA + ADP + PI       | 6.3.2.15 |
| Glutamate racemase                                              | 492 | <i>murI</i>  | GLU <-> DGLU                                | 5.1.1.3  |
| D-ala:D-ala ligases                                             | 493 | <i>ddlAB</i> | 2 DALA <-> AA                               | 6.3.2.4  |
| Phospho-N-acetylmuramoylpentapeptide transferase                | 494 | <i>mraY</i>  | UNAGDA -> UMP + PI + UNPTDO                 |          |
| N-Acetylglucosaminyl transferase                                | 679 | <i>murG</i>  | UNPTDO + UDPNAG -> UDP + PEPTIDO            |          |

## Membrane Transport

### Carbohydrates

|                           |     |                                 |                                 |  |
|---------------------------|-----|---------------------------------|---------------------------------|--|
| Arabinose (low affinity)  | 495 | <i>araE</i>                     | ARABxt + HEXT <-> ARAB          |  |
| Arabinose (high affinity) | 571 | <i>araFGH</i>                   | ARABxt + ATP -> ARAB + ADP + PI |  |
| Dihydroxyacetone          | 496 |                                 | DHAXt + PEP -> T3P2 + PYR       |  |
| Fructose                  | 497 | <i>fruABF</i>                   | FRUxt + PEP -> FIP + PYR        |  |
| Fucose                    | 498 | <i>fucP</i>                     | FUCxt + HEXT <-> FUC            |  |
| Galactitol                | 499 | <i>gatABC</i>                   | GLTLxt + PEP -> GLTLIP + PYR    |  |
| Galactose (low affinity)  | 500 | <i>galP</i>                     | GLACxt + HEXT -> GLAC           |  |
| Galactose (low affinity)  |     | <i>galP</i>                     | GLCxt + HEXT -> GLC             |  |
| Galactose (high affinity) | 572 | <i>mglABC</i>                   | GLACxt + ATP -> GLAC + ADP + PI |  |
| Glucitol                  | 501 | <i>srlAIA2B</i>                 | GLTxt + PEP -> GLT6P + PYR      |  |
| Gluconate                 | 502 | <i>gntST</i>                    | GLCNxt + ATP -> GLCN + ADP + PI |  |
| Glucose                   | 504 | <i>ptsG, crr</i>                | GLCxt + PEP -> G6P + PYR        |  |
| Glycerol                  | 505 | <i>glpF</i>                     | GLxt <-> GL                     |  |
| Lactose                   | 506 | <i>lacY</i>                     | LACxt + HEXT <-> LAC            |  |
| Maltose                   | 507 | <i>malX, crr, malEFGK, lamB</i> | MLTxt + PEP -> MLT6P + PYR      |  |
| Mannitol                  | 508 | <i>mtlA, cmtAB</i>              | MNTxt + PEP -> MNT6P + PYR      |  |
| Mannose                   | 509 | <i>manXYZ, ptsPAI</i>           | MANxt + PEP -> MAN1P + PYR      |  |
| Melibiose                 | 510 | <i>melB</i>                     | MELIxt + HEXT -> MELI           |  |
| N-Acetylglucosamine       | 511 | <i>nagE, ptsN</i>               | NAG + PEP -> NAGP + PYR         |  |
| Rhamnose                  | 512 | <i>rhaT</i>                     | RMNxt + ATP -> RMN + ADP + PI   |  |
| Ribose                    | 513 | <i>rhsABCD, xylH</i>            | RIBxt + ATP -> RIB + ADP + PI   |  |
| Sucrose                   | 515 | <i>scr</i>                      | SUCxt + PEP -> SUC6P + PYR      |  |
| Trehalose                 | 516 | <i>treAB</i>                    | TRExt + PEP -> TRE6P + PYR      |  |
| Xylose (low affinity)     | 517 | <i>xylE</i>                     | XYLxt + HEXT -> XYL             |  |
| Xylose (high affinity)    | 573 | <i>xylFG, rhsB</i>              | XYLxt + ATP -> XYL + ADP + PI   |  |

### Amino Acids

|                                     |     |                               |                                 |  |
|-------------------------------------|-----|-------------------------------|---------------------------------|--|
| Alanine                             | 518 | <i>cycA</i>                   | ALAXt + ATP -> ALA + ADP + PI   |  |
| Arginine                            | 519 | <i>artPMQII, argT, hisMQP</i> | ARGxt + ATP -> ARG + ADP + PI   |  |
| Asparagine (low Affinity)           | 520 |                               | ASNxt + HEXT <-> ASN            |  |
| Asparagine (high Affinity)          | 574 |                               | ASNxt + ATP -> ASN + ADP + PI   |  |
| Aspartate                           | 521 | <i>gltP</i>                   | ASPxt + HEXT -> ASP             |  |
| Aspartate                           | 575 | <i>gltJKL</i>                 | ASPxt + ATP -> ASP + ADP + PI   |  |
| Branched chain amino acid transport | 522 | <i>brnQ</i>                   | BCAAxt + HEXT <-> BCAA          |  |
| Branched chain amino acid transport |     | <i>braB</i>                   |                                 |  |
| Cysteine                            | 523 | <i>not identified</i>         | CYSxt + ATP -> CYS + ADP + PI   |  |
| D-Alanine                           | 524 | <i>cycA</i>                   | DALAXt + ATP -> DALA + ADP + PI |  |
| D-Alanine glycine permease          |     | <i>cycA</i>                   | DALAXt + HEXT <-> DALA          |  |
| D-Alanine glycine permease          |     | <i>cycA</i>                   | DSERxt + HEXT <-> DSER          |  |
| D-Alanine glycine permease          |     | <i>cycA</i>                   | GLYxt + HEXT <-> GLY            |  |
| Diaminopimelic acid                 | 525 |                               | MDAPxt + ATP -> MDAP + ADP + PI |  |
| $\gamma$ -Aminobutyrate transport   | 614 | <i>gabP</i>                   | GABAXt + ATP -> GABA + ADP + PI |  |
| Glutamate                           | 526 | <i>gltP</i>                   | GLUxt + HEXT <-> GLU            |  |
| Glutamate                           | 576 | <i>gltS</i>                   | GLUxt + HEXT <-> GLU            |  |
| Glutamate                           | 680 | <i>gltJKL</i>                 | GLUxt + ATP -> GLU + ADP + PI   |  |
| Glutamine                           | 527 | <i>glnHPQ</i>                 | GLNxt + ATP -> GLN + ADP + PI   |  |

|                                         |     |                       |                                   |
|-----------------------------------------|-----|-----------------------|-----------------------------------|
| Glycine                                 | 528 | <i>cycA, proVWX</i>   | GLYxt + ATP -> GLY + ADP + PI     |
| Histidine                               | 529 | <i>hisJMPQ</i>        | HISxt + ATP -> HIS + ADP + PI     |
| Isoleucine                              | 530 | <i>livJ</i>           | ILExt + ATP -> ILE + ADP + PI     |
| Leucine                                 | 531 | <i>livHKM/li yFGJ</i> | LEUxt + ATP -> LEU + ADP + PI     |
| Lysine                                  | 532 | <i>lysP</i>           | LYSxt + HEXT <-> LYS              |
| Lysine                                  | 577 | <i>argT, hisMPQ</i>   | LYSxt + ATP -> LYS + ADP + PI     |
| Lysine/Cadaverine                       | 615 | <i>cadB</i>           | LYSxt + ATP -> LYS + ADP + PI     |
| Methionine                              | 533 | <i>metD</i>           | METxt + ATP -> MET + ADP + PI     |
| Ornithine                               | 534 | <i>argT, hisMPQ</i>   | ORNxt + ATP -> ORN + ADP + PI     |
| Phenylalanine                           | 535 | <i>aroP/mtr/ pheP</i> | PHExt + HEXT <-> PHE              |
| Proline                                 | 536 | <i>putP, proPWX</i>   | PROxt + HEXT <-> PRO              |
| Proline                                 |     | <i>cycA, proVW</i>    | PROxt + ATP -> PRO + ADP + PI     |
| Putrescine                              | 537 | <i>potEFHIG</i>       | PTRCxt + ATP -> PTRC + ADP + PI   |
| Serine                                  | 538 | <i>sdaC</i>           | SERxt + HEXT <-> SER              |
| Serine                                  | 578 | <i>cycA</i>           | SERxt + ATP -> SER + ADP + PI     |
| <b>Spermidine</b> & putrescine          | 539 | <i>potABCD</i>        | SPMDxt + ATP -> SPMD + ADP + PI   |
| Spermidine & <b>putrescine</b>          | 539 | <i>potABCD</i>        | PTRCxt + ATP -> PTRC + ADP + PI   |
| Threonine                               | 540 | <i>livJ</i>           | THRxt + ATP -> THR + ADP + PI     |
| Threonine                               | 579 | <i>tdcC</i>           | THRxt + HEXT <-> THR              |
| Tryptophan                              | 541 | <i>tnaB</i>           | TRPxt + HEXT <-> TRP              |
| Tyrosine                                | 542 | <i>tyrP</i>           | TYRxt + HEXT <-> TYR              |
| Valine                                  | 543 | <i>livJ</i>           | VALxt + ATP -> VAL + ADP + PI     |
| Dipeptide                               | 616 | <i>dppABCD F</i>      | DIPEPxt + ATP -> DIPEP + ADP + PI |
| Oligopeptide                            | 617 | <i>oppABCD F</i>      | OPEPxt + ATP -> OPEP + ADP + PI   |
| Peptide                                 |     | <i>sapABD</i>         | PEPTxt + ATP -> PEPT + ADP + PI   |
| <b>Purines &amp; Pyrimidines</b>        |     |                       |                                   |
| Ribonucleotide transport                | 544 | <i>mkl</i>            |                                   |
| Uracil                                  | 545 | <i>uraA</i>           | URAXt + HEXT -> URA               |
| Nicotinamide mononucleotide transporter | 546 | <i>pnuC</i>           | NMNxt + HEXT -> + NMN             |
| Cytosine                                | 547 | <i>codB</i>           | CYTSxt + HEXT -> CYTS             |
| Adenine                                 | 548 | <i>purB</i>           | ADxt + HEXT -> AD                 |
| Guanine                                 | 549 | <i>gpt, hpt</i>       | GNxt <-> GN                       |
| Hypoxanthine                            | 550 | <i>gpt, hpt</i>       | HYXNxt <-> HYXN                   |
| Xanthosine                              | 618 | <i>xapB</i>           | XTSNxt <-> XTSN                   |
| Xanthine                                | 551 | <i>gpt</i>            | XANxt <-> XAN                     |
| G-system                                | 552 | <i>nupG</i>           | ADNxt + HEXT -> ADN               |
| G-system                                |     | <i>nupG</i>           | GSNxt + HEXT -> GSN               |
| G-system                                |     | <i>nupG</i>           | URIXt + HEXT -> URI               |
| G-system                                |     | <i>nupG</i>           | CYTDxt + HEXT -> CYTD             |
| G-system (transports all nucleosides)   |     | <i>nupG</i>           | INSxt + HEXT -> INS               |
| G-system                                |     | <i>nupG</i>           | XTSNxt + HEXT -> XTSN             |
| G-system                                |     | <i>nupG</i>           | DTxt + HEXT -> DT                 |
| G-system                                |     | <i>nupG</i>           | DINxt + HEXT -> DIN               |
| G-system                                |     | <i>nupG</i>           | DGxt + HEXT -> DG                 |
| G-system                                |     | <i>nupG</i>           | DAxt + HEXT -> DA                 |
| G-system                                |     | <i>nupG</i>           | DCxt + HEXT -> DC                 |
| G-system                                |     | <i>nupG</i>           | DUxt + HEXT -> DU                 |
| C-system                                | 553 | <i>nupC</i>           | ADNxt + HEXT -> ADN               |
| C-system                                |     | <i>nupC</i>           | URIXt + HEXT -> URI               |
| C-system                                |     | <i>nupC</i>           | CYTDxt + HEXT -> CYTD             |
| C-system                                |     | <i>nupC</i>           | DTxt + HEXT -> DT                 |
| C-system                                |     | <i>nupC</i>           | DAxt + HEXT -> DA                 |
| C-system                                |     | <i>nupC</i>           | DCxt + HEXT -> DC                 |
| C-system                                |     | <i>nupC</i>           | DUxt + HEXT -> DU                 |
| Nucleosides and deoxynucleoside         | 554 | <i>tsx</i>            | ADNxt + HEXT -> ADN               |
| Nucleosides and deoxynucleoside         |     | <i>tsx</i>            | GSNxt + HEXT -> GSN               |
| Nucleosides and deoxynucleoside         |     | <i>tsx</i>            | URIXt + HEXT -> URI               |

Nucleosides and deoxynucleoside  
 Nucleosides and deoxynucleoside

*tsx* CYTDxt + HEXT -> CYTD  
*tsx* INSxt + HEXT -> INS  
*tsx* XTSNxt + HEXT -> XTSN  
*tsx* DTxt + HEXT -> DT  
*tsx* DINxt + HEXT -> DIN  
*tsx* DGxt + HEXT -> DG  
*tsx* DAxt + HEXT -> DA  
*tsx* DCxt + HEXT -> DC  
*tsx* DUxt + HEXT -> DU

Metabolic By-Products

Acetate transport 555  
 L-Lactate 619  
 Formate transport 557  
 Ethanol transport 558  
 Succinate transport 559  
 Pyruvate transport 559

ACxt + HEXT <-> AC  
*lldP* LACxt + HEXT <-> LAC  
*focA* FORxt <-> FOR  
 ETHxt + HEXT <-> ETH  
*dcuAB* SUCCxt + HEXT <-> SUCC  
 PYRxt + HEXT <-> PYR

Other Compounds

Ammonia transport 560  
 Potassium transport 561  
 Potassium transport 580  
 Sulfate transport 562  
 Phosphate transport 563  
 Phosphate transport 581  
 Hexose phosphate transport 620  
 Glycerol-3-phosphate 564  
 Nitrate transport 621  
 Vitamin B12 622  
 Dicarboxylates 566  
 Dicarboxylates 582  
 Dicarboxylates 583  
 Dicarboxylates 584  
 Fatty acid transport 623  
 Fatty acid transport 623  
 Fatty acid transport 623  
 α-Ketoglutarate 567  
 D-Glyceraldehyde transport 568  
 Na/H antiporter 569  
 Na/H antiporter 713  
 Na/H antiporter  
 Pantothenate 570  
 Sialic acid permease  
 Oxygen transport  
 Carbon dioxide transport  
 Urea transport  
 ATP drain flux for constant maintenance requirements  
 Glyceraldehyde transport  
 Acetaldehyde transport

*amtB* NH3xt + HEXT <-> NH3  
*kdpABC* Kxt + ATP -> K + ADP + PI  
*trkAEHG* Kxt + HEXT <-> K  
*cysPTUW* SLFxt + ATP -> SLF + ADP + PI  
*AZ, sbp*  
*pstABCS* P1xt + ATP -> ADP + 2 PI  
*pitAB* P1xt + HEXT <-> PI  
*uhpT*  
*glpT, ugpABCE* GL3Pxt + PI -> GL3P  
*narK*  
*btuBCDE*  
*dcuAB, dctA* SUCCxt + HEXT <-> SUCC  
*dcuAB, dctA* FUMxt + HEXT <-> FUM  
*dcuAB, dctA* MALxt + HEXT <-> MAL  
*dcuAB, dctA* ASPxt + HEXT <-> ASP  
*fadL* C140xt -> C140  
*fadL* C160xt -> C160  
*fadL* C180xt -> C180  
*kgtP* AKGxt + HEXT <-> AKG  
*nhaABC* NAxt + <-> NA + HEXT  
*chaABC* NAxt + <-> NA + HEXT  
*napA* NAxt + <-> NA + HEXT  
*panF* PNT0xt + HEXT <-> PNT0  
*nanT* SLAxt + ATP -> SLA + ADP + PI  
 O2xt <-> O2  
 CO2xt <-> CO2  
 UREAxt + 2 HEXT <-> UREA  
 ATP -> ADP + PI  
*gufP* GLALxt <-> GLAL  
 ACALxt <-> ACAL
