# Supplementary material
Source: PubMed Central journal article supplement (PMC29061)
Supplement: 1471-2105-1-1-s3.pdf [file 1471-2105-1-1-s3.pdf]

| Chart # | Abbrev.      | Name                                                      |
|---------|--------------|-----------------------------------------------------------|
| 1       | GLC          | $\alpha$ -D-Glucose                                       |
| 2       | G6P          | Glucose 6-phosphate                                       |
| 3       | F6P          | Fructose 6-phosphate                                      |
| 4       | FDP          | Fructose 1,6-diphosphate                                  |
| 5       | T3P2/DHAP    | Dihydroxyacetone phosphate                                |
| 6       | T3P1         | Glyceraldehyde 3-phosphate                                |
| 7       | 13PDG        | 1,3-bis-Phosphoglycerate                                  |
| 8       | 3PG          | 3-Phosphoglycerate                                        |
| 9       | 2PG          | 2-Phosphoglycerate                                        |
| 10      | PEP          | Phosphoenolpyruvate                                       |
| 11      | PYR          | Pyruvate                                                  |
| 12      | ACCOA        | Acetyl-CoA                                                |
| 13      | CIT          | Citrate                                                   |
| 14      | ACO          | <i>cis</i> -Aconitate                                     |
| 15      | ICIT         | Isocitrate                                                |
| 16      | AKG          | $\alpha$ -Ketoglutarate                                   |
| 17      | SUCCOA       | Succinate CoA                                             |
| 18      | SUCC         | Succinate                                                 |
| 19      | FUM          | Fumarate                                                  |
| 20      | MAL          | Malate                                                    |
| 21      | OA           | Oxaloacetate                                              |
| 22      | ACAL         | Acetaldehyde                                              |
| 23      | ACTP         | Acetyl-phosphate                                          |
| 24      | ETH          | Ethanol                                                   |
| 25      | AC           | Acetate                                                   |
| 26      | LAC          | D-Lactate                                                 |
| 27      | FORMATE      | Formate                                                   |
| 28      | D6PGL        | D-6-Phosphate-glucono-delta-lactone                       |
| 29      | D6PGC        | D-6-Phosphate-gluconate                                   |
| 30      | RL5P         | Ribulose 5-phosphate                                      |
| 31      | X5P          | Xylulose-5-phosphate                                      |
| 32      | R5P          | Ribose 5-phosphate                                        |
| 33      | S7P          | sedo-Heptulose                                            |
| 34      | E4P          | Erythrose 4-phosphate                                     |
| 35      | GLX          | Glyoxylate                                                |
| 36      | NADH         | Nicotinamide adenine dinucleotide reduced                 |
| 37      | NADPH        | Dihyronicotinamide adenine dinucleotide phosphate reduced |
| 38      | HEXT         | External H <sup>+</sup>                                   |
| 39      | Q            | Ubiquinone                                                |
| 40      | FADH         | Flavin adenine dinucleotide reduced                       |
| 41      | ATP          | Adenosine triphosphate                                    |
| 50      | G1P          | Glucose 1-phosphate                                       |
| 75      | GL3P         | Glycerol 3-phosphate                                      |
| 104     | CO2          | Carbon dioxide                                            |
| 390     | $\beta$ DGLC | $\beta$ -D-Glucose                                        |
| 391     | OTHIO        | Thioredoxin (oxidized form)                               |
| 391     | RTHIO        | Thioredoxin (reduced form)                                |
| 392     | GLYCOGEN     | Glycogen                                                  |
| 403     | ADPGLC       | ADP-Glucose                                               |

|     |           |                                    |
|-----|-----------|------------------------------------|
| 413 | GLAL      | D-Glyceraldehyde                   |
| 416 | 2KD6PG    | 2-keto-3-deoxy-6-phospho-gluconate |
| 1   | GLC       | $\alpha$ -D-Glucose                |
| 2   | G6P       | Glucose 6-phosphate                |
| 3   | F6P       | Fructose 6-phosphate               |
| 4   | FDP       | Fructose 1,6-diphosphate           |
| 5   | T3P2/DHAP | Dihydroxyacetone phosphate         |
| 6   | T3P1      | Glyceraldehyde 3-phosphate         |
| 22  | ACAL      | Acetaldehyde                       |
| 29  | D6PGC     | D-6-Phosphate-gluconate            |
| 30  | RL5P      | Ribulose 5-phosphate               |
| 31  | X5P       | Xylulose-5-phosphate               |
| 32  | R5P       | Ribose 5-phosphate                 |
| 42  | SUC6P     | Sucose 6-phosphate                 |
| 43  | FRUC      | Fructose                           |
| 44  | MELI      | Melibiose                          |
| 45  | LCTS      | Lactose                            |
| 46  | GLAC      | Galactose                          |
| 47  | GAL1P     | Galactose 1-Phosphate              |
| 48  | UDPG      | UDP Glucose                        |
| 49  | UDPGAL    | UDP Galactose                      |
| 50  | G1P       | Glucose 1-phosphate                |
| 51  | DR1P      | Deoxyribose 1-Phosphate            |
| 52  | DR5P      | Deoxyribose 5-Phosphate            |
| 53  | TRE6P     | Trehalase 6-phosphate              |
| 54  | bDG6P     | $\beta$ -D-Glucose 6-Phosphate     |
| 55  | FUC       | Fucose                             |
| 56  | FCL       | Fuculose                           |
| 57  | FCL1P     | Fuculose 1-Phosphate               |
| 58  | LACAL     | Lactaldehyde                       |
| 59  | 12PPD     | 1,2-Propanediol                    |
| 60  | LLAC      | L-Lactate                          |
| 61  | RMN       | Rhamnose                           |
| 62  | RML       | Rhamnulose                         |
| 63  | RML1P     | Rhamnulose 1-phosphate             |
| 64  | GLTL1P    | Galacitol-1-Phosphate              |
| 65  | TAG6P     | Tagatose-6-phosphate               |
| 66  | TAG16P    | Tagatose-1,6 diphosphate           |
| 67  | ARAB      | Arabinose                          |
| 68  | RBL       | Ribulose                           |
| 69  | F1P       | Fructose 1-Phosphate               |
| 70  | MNT6P     | Mannitol 6-Phosphate               |
| 71  | MAN1P     | Mannose 1-Phosphate                |
| 72  | R1P       | Ribose 1-phosphate                 |
| 73  | RIB       | Ribose                             |
| 74  | GL        | Glycerol                           |
| 75  | GL3P      | Glycerol 3-phosphate               |
| 76  | SOR1P     | Sorbose 1-phosphate                |
| 77  | GLT6P     | Glucitol 6-Phosphate               |
| 78  | NAGP      | N-Acetylglucosamine                |

|             |                                 |
|-------------|---------------------------------|
| 79 GA6P     | D-Glucosamine                   |
| 80 XYL      | Xylose                          |
| 81 XUL      | Xylulose                        |
| 82 GLCN     | Gluconate                       |
| 390 βDGLC   | β-D-Glucose                     |
| 394 MAN6P   | Mannose 6-Phosphate             |
| 8 3PG       | 3-Phosphoglycerate              |
| 10 PEP      | Phosphoenolpyruvate             |
| 11 PYR      | Pyruvate                        |
| 12 ACCOA    | Acetyl-CoA                      |
| 16 AKG      | α-Ketoglutarate                 |
| 18 SUCC     | Succinate                       |
| 19 FUM      | Fumarate                        |
| 21 OA       | Oxaloacetate                    |
| 32 R5P      | Ribose 5-phosphate              |
| 34 E4P      | Erythrose 4-phosphate           |
| 83 ASP      | Aspartate                       |
| 84 ASN      | Asparagine                      |
| 85 GLU      | Glutamate                       |
| 86 GLN      | Glutamine                       |
| 87 ALA      | Alanine                         |
| 88 VAL      | Valine                          |
| 89 DALA     | D-Alanine                       |
| 90 NAGLU    | N-Acetyl glutamate              |
| 91 NAGLUYP  | N-Acetyl glutamyl -phosphate    |
| 92 NAGLUSAL | N-Acetyl glutamate semialdehyde |
| 93 NAARON   | N-α-Acetyl ornithine            |
| 94 ORN      | Ornithine                       |
| 95 CITR     | L-Citrulline                    |
| 96 ARGSUCC  | L-Arginio succinate             |
| 97 ARG      | Arginine                        |
| 98 AGM      | Agmatine                        |
| 99 PTRC     | Putrescine                      |
| 100 SPMD    | Spermidine                      |
| 101 GABAL   | γ-aminobutyraldehyde            |
| 102 GABA    | 4-Aminobutanoate                |
| 103 SUCCSAL | Succinate semialdehyde          |
| 104 CO2     | Carbon dioxide                  |
| 105 CAP     | Carbamoyl phosphate             |
| 106 OBUT    | Oxobutyrate                     |
| 107 ABUT    | 2-Aceto-2-hydroxy butyrate      |
| 108 DHMVA   | 2,3-Dihydroxy-3-methyl-valerate |
| 109 OMVAL   | Oxomethylvalerate               |
| 110 ILE     | Isoleucine                      |
| 111 ACLAC   | Acetolactate                    |
| 112 DHVAL   | Dihydroxy-isovalerate           |
| 113 OIVAL   | Oxoisovalerate                  |
| 114 CBHCAP  | 3-Carboxy-3-hydroxy-isocaproate |
| 115 IPPMAL  | 3-Isopropylmalate               |
| 116 OICAP   | 2-Oxoisocaproate                |

|             |                                                    |
|-------------|----------------------------------------------------|
| 117 LEU     | Leucine                                            |
| 118 3DDAH7P | 3-Deoxy-d-arabino heptulosonate-7-phosphate        |
| 119 DQT     | 3-Dehydroquinate                                   |
| 120 DHSK    | Dehydroshikimate                                   |
| 121 SME     | Shikimate                                          |
| 122 SME5P   | Shikimate-5-phosphate                              |
| 123 3PSME   | 3-Phosphate-shikimate                              |
| 124 CHOR    | Chorisimate                                        |
| 125 PHEN    | Prephenate                                         |
| 126 HPHPYR  | para-Hydroxy phenyl pyruvate                       |
| 127 TYR     | Tyrosine                                           |
| 128 PHPYR   | Phenyl pyruvate                                    |
| 129 PHE     | Phenylalanine                                      |
| 130 AN      | Antranilate                                        |
| 131 NPRAN   | N-5-phosphoribosyl-antranilate                     |
| 132 CPAD5P  | 1-O-Carboxyphenylamino 1-deoxyribose-5-phosphate   |
| 133 IGP     | Indole glycerol phosphate                          |
| 134 TRP     | Tryptophan                                         |
| 135 PRPP    | Phosphoribosyl pyrophosphate                       |
| 136 PRBATP  | Phosphoribosyl-ATP                                 |
| 137 PRBAMP  | Phosphoribosyl -AMP                                |
| 138 PRFP    | Phosphoribosyl-formimino-AICAR-phosphate           |
| 139 PRLP    | Phosphoribosyl- formimino-AICAR-phosphate          |
| 140 DIMGP   | D-Erythro imidazoleglycerol-phosphate              |
| 141 IMACP   | Imidazole acetyl-phosphate                         |
| 142 HISOLP  | L-Histidinol-phosphate                             |
| 143 HISOL   | Histidinol                                         |
| 144 HIS     | Histidine                                          |
| 145 AICAR   | 5-Phosphate-ribose-5-amino-4-imidazole carboxamide |
| 146 PHP     | 3-Phosphohydroxypyruvate                           |
| 147 3PSER   | 3-Phosphoserine                                    |
| 148 SER     | Serine                                             |
| 149 GLY     | Glycine                                            |
| 150 SLF     | Sulfate                                            |
| 151 APS     | Adenylyl sulfate                                   |
| 152 PAPS    | 3-Phosphoadenylyl sulfate                          |
| 153 H2SO3   | Sulfite                                            |
| 154 H2S     | Hydrogen sulfide                                   |
| 155 PAP     | Adenosine-3',5'-diphosphate                        |
| 156 AMP     | Adenosine monophosphate                            |
| 157 ASER    | O-Acetylserine                                     |
| 158 CYS     | Cysteine                                           |
| 159 BASP    | $\beta$ -Aspartyl phosphate                        |
| 160 ASPSA   | Aspartic beta-semialdehyde                         |
| 161 HSER    | Homoserine                                         |
| 162 PHSER   | O-Phospho-l-homoserine                             |
| 163 THR     | Threonine                                          |
| 164 2A3O    | 2-Amino-3-oxobutanoate                             |
| 165 D23PIC  | 2,3-Dihydro dipicolinate                           |
| 166 PIP26DX | Delta-piperidine-2,6-dicarboxylate                 |

|             |                                                             |
|-------------|-------------------------------------------------------------|
| 167 NS2A6O  | N-Succinyl-2-amino-6-ketopimelate                           |
| 168 NS26DP  | N-Succinyl-L,L-2,6-diaminopimelate                          |
| 169 D26PIM  | L,L-2,6-Diamino pimelate                                    |
| 170 MDAP    | Meso-diaminopimelate                                        |
| 171 LYS     | L-Lysine                                                    |
| 172 OSLHSER | O-Succinyl-L-homoserine                                     |
| 173 LLCT    | L-Cystathionine                                             |
| 174 HCYS    | Homocysteine                                                |
| 175 SAH     | S-Adenosyl homocystine                                      |
| 176 MET     | Methionine                                                  |
| 177 SAM     | S-Adenosyl methionine                                       |
| 225 GLUP    | Glutaryl phosphate                                          |
| 226 GLUGSAL | L-Glutamate $\gamma$ -semialdehyde                          |
| 227 PRO     | Proline                                                     |
| 231 5MTRP   | S5-Methyl-5-thio-D-ribose 1-phosphate                       |
| 282 5MTA    | 5-Methylthioadenosine                                       |
| 382 5MTR    | 5-Methylthio-D-ribose                                       |
| 391 OTHIO   | Thioredoxin (oxidized form)                                 |
| 391 RTHIO   | Thioredoxin (reduced form)                                  |
| 395 CADV    | Cadaverine                                                  |
| 396 DSER    | D-Serine                                                    |
| 407 5MTR1P  | 5-Methylthio-5-deoxy-D-ribulose 1-phosphate                 |
| 408 DKMPP   | 2,3-Diketo-5-methylthio-1-phosphopentane                    |
| 409 KMB     | $\alpha$ -keto- $\gamma$ -methiobutyrate                    |
| 412 DSAM    | Decarboxylated adenosylmethionine                           |
| 41 ATP      | Adenosine triphosphate                                      |
| 83 ASP      | Aspartate                                                   |
| 105 CAP     | Carbamoyl phosphate                                         |
| 135 PRPP    | Phosphoribosyl pyrophosphate                                |
| 145 AICAR   | 5-Phosphate-ribosyl-5-amino-4-imidazole carboxamide         |
| 156 AMP     | Adenosine monophosphate                                     |
| 178 PRAM    | 5-Phosphate- $\beta$ -D-ribosyl amine                       |
| 179 GAR     | 5-Phosphate-ribosyl glycineamide                            |
| 180 FGAR    | 5-Phosphoribosyl-n-formylglycineamide                       |
| 181 FGAM    | 5-Phosphoribosyl-n-formylglycineamidine                     |
| 182 AIR     | 5-Phosphoribosyl-5-aminoimidazole                           |
| 183 NCAIR   | 5'-Phosphoribosyl-5-carboxyaminoimidazole                   |
| 184 CAIR    | 5-Phosphoribosyl-5-aminoimidazole-4-carboxylate             |
| 185 SAICAR  | 5-Phosphoribosyl-4-(N-succinocarboxamide)-5-amino-imidazole |
| 186 PRFICA  | 5-Phosphate-ribosyl-formamido-4-imidazole carboxamide       |
| 187 IMP     | Inosine monophosphate                                       |
| 188 XMP     | Xantosine monophosphate                                     |
| 189 GMP     | Guanosine monophosphate                                     |
| 190 ASUC    | Adenilsuccinate                                             |
| 191 CAASP   | Carbamoyl aspartate                                         |
| 192 DOROA   | Dihydroorotic acid                                          |
| 193 OROA    | Orotic acid                                                 |
| 194 OMP     | Orotidylate                                                 |
| 195 UMP     | Uridine monophosphate                                       |
| 196 UDP     | Uridine diphosphate                                         |

|     |           |                               |
|-----|-----------|-------------------------------|
| 197 | UTP       | Uridine triphosphate          |
| 198 | CTP       | Cytidine triphosphate         |
| 215 | GTP       | Guanosine triphosphate        |
| 228 | IDP       | Inosine diphosphate           |
| 229 | ITP       | Inosine triphosphate          |
| 230 | ADP       | Adenosine diphosphate         |
| 232 | DATP      | Deoxyadenosine triphosphate   |
| 233 | DADP      | Deoxyadenosine diphosphate    |
| 234 | DAMP      | Deoxyadenosine monophosphate  |
| 235 | DA        | Deoxyadenosine                |
| 236 | DIN       | Deoxyinosine                  |
| 237 | ADN       | Adenosine                     |
| 238 | AD        | Adenine                       |
| 239 | INS       | Inosine                       |
| 240 | HYXN      | Hypoxanthine                  |
| 241 | XAN       | Xanthine                      |
| 242 | XTSN      | Xanthosine                    |
| 243 | GN        | Guanine                       |
| 244 | GSN       | Guanosine                     |
| 245 | GDP       | Guanosine diphosphate         |
| 246 | DGTP      | Deoxyguanosine triphosphate   |
| 247 | DGDP      | Deoxyguanosine diphosphate    |
| 248 | DGMP      | 2-Deoxy-guanosine-5-phosphate |
| 249 | DG        | Deoxyguanosine                |
| 250 | URI       | Uridine                       |
| 251 | URA       | Uracil                        |
| 252 | CYTS      | Cytosine                      |
| 253 | CYTD      | Cytidine                      |
| 254 | CMP       | Cytidine monophosphate        |
| 255 | CDP       | Cytidine diphosphate          |
| 256 | DCTP      | Deoxycytidine triphosphate    |
| 257 | DCDP      | Deoxycytidine diphosphate     |
| 258 | DCMP      | Deoxycytidine monophosphate   |
| 259 | DC        | Deoxycytidine                 |
| 260 | DU        | Deoxyuridine                  |
| 261 | DUMP      | Deoxyuridine monophosphate    |
| 262 | DUDP      | Deoxyuridine diphosphate      |
| 263 | DUTP      | Deoxyuridine triphosphate     |
| 264 | DTMP      | Thymidine monophosphate       |
| 265 | DTDP      | Thymidine diphosphate         |
| 266 | DTTP      | Thymidine triphosphate        |
| 267 | DT        | Thymidine                     |
| 268 | THY       | Thymine                       |
| 5   | T3P2/DHAP | Dihydroxyacetone phosphate    |
| 6   | T3P1      | Glyceraldehyde 3-phosphate    |
| 11  | PYR       | Pyruvate                      |
| 16  | AKG       | $\alpha$ -Ketoglutarate       |
| 30  | RL5P      | Ribulose 5-phosphate          |
| 34  | E4P       | Erythrose 4-phosphate         |
| 83  | ASP       | Aspartate                     |

|     |         |                                                                         |
|-----|---------|-------------------------------------------------------------------------|
| 85  | GLU     | Glutamate                                                               |
| 87  | ALA     | Alanine                                                                 |
| 113 | OIVAL   | Oxoisovalerate                                                          |
| 124 | CHOR    | Chorisimate                                                             |
| 135 | PRPP    | Phosphoribosyl pyrophosphate                                            |
| 148 | SER     | Serine                                                                  |
| 158 | CYS     | Cysteine                                                                |
| 182 | AIR     | 5-Phosphoribosyl-5-aminoimidazole                                       |
| 199 | 4HBZ    | 4-Hydroxybenzoate                                                       |
| 200 | O4HBZ   | 3-Octaprenyl-4-hydroxybenzoate                                          |
| 201 | 2OPPP   | 2-Octaprenylphenol                                                      |
| 202 | 2O6H    | 2-Octaprenol 6-hydroxyphenol                                            |
| 203 | 2OPMP   | 2-Octaprenyl-6-methoxyphenol                                            |
| 204 | 2OPMB   | 2-Octaprenyl-6-methoxy-1,4-benzoquinone                                 |
| 205 | 2OPMMB  | 2-Octaprenyl-3-methyl-6-methoxy-1,4-benzoquinone                        |
| 206 | 2OMHMB  | 2-Octaprenyl-3-methyl-5-hydroxy-6-methoxy-1,4-benzoquinone              |
| 207 | QH2     | Ubiquinol                                                               |
| 208 | ICHOR   | Isochorismate                                                           |
| 209 | SHCHC   | 2-Succinyl-6-hydroxy-2,4-cyclohexadiene-1-carboxylate                   |
| 210 | OSB     | O-Succinylbenzoic acid                                                  |
| 211 | OSBCOA  | O-Succinylbenzoyl-CoA                                                   |
| 212 | DHNA    | 1,4-Dihydroxy-2-naphthoic acid                                          |
| 213 | DMK     | Demethylmenaquinone                                                     |
| 214 | MK      | Menaquinone                                                             |
| 215 | GTP     | Guanosine triphosphate                                                  |
| 216 | D6RP5P  | 2,5-Diamino-6-(ribosylamino)-4-(3H)-pyrimidinone 5'-phosphate           |
| 217 | A6RP5P  | 5-Amino-6-(ribosylamino)-2,4-(1H,3H)-pyrimidinedione 5'-phosphate       |
| 218 | A6RP5P2 | 5-Amino-2,6-dioxy-4-(5'-phosphoribitylamino)pyrimidine                  |
| 219 | A6RP    | 5-Amino-6-ribitylamino-2,4(1H,3H)-pyrimidinedione                       |
| 220 | DB4P    | 3,4-Dihydroxy-2-butanone-4-phosphate                                    |
| 221 | D8RL    | 6,7-Dimethyl-8-(1-D-ribityl)lumazine                                    |
| 222 | RIBFLV  | Riboflavin                                                              |
| 223 | FMN     | flavin mononucleotide                                                   |
| 224 | FAD     | Flavin adenine dinucleotide                                             |
| 269 | THF     | Tetrahydrofolate                                                        |
| 270 | METTHF  | 5,10-Methylene tetrahydrofolate                                         |
| 271 | MTHF    | 5-Methyl tetrahydrofolate                                               |
| 272 | METHF   | 5,10-Methenyl tetrahydrofolate                                          |
| 273 | FTHF    | 10-formyl-tetrahydrofolate                                              |
| 274 | DHF     | Dihydrofolate                                                           |
| 296 | OPP     | trans Octaprenyl pyrophosphate                                          |
| 298 | AHTD    | 2-Amino-4-hydroxy-6-(erythro-1-2-3-trihydroxypropyl) dihydropteridine-p |
| 299 | DHP     | Dihydroneopterin                                                        |
| 300 | AHHMP   | 2-Amino-4-hydroxy-6-hydroxymethyl dihydropteridine                      |
| 301 | AHHMD   | 2-Amino-4-hydroxy-6-hydroxymethyl dihydropteridine-pp                   |
| 302 | ADCHOR  | 4-Amino-4-deoxychorismate                                               |
| 303 | PABA    | para-Aminobenzoic acid                                                  |
| 304 | DHPT    | 7,8-Dihydropteroate                                                     |
| 305 | AKP     | $\alpha$ -Ketopantoate                                                  |

|             |                                                          |
|-------------|----------------------------------------------------------|
| 306 PANT    | Pantoate                                                 |
| 307 PNTD    | Pantothenate                                             |
| 308 4PPNTO  | 4'-Phosphopantothenate                                   |
| 309 4PPNCYS | 4'-Phosphopantothencycysteine                            |
| 310 4PPNTE  | 4'-Phosphopantetheine                                    |
| 311 DPCOA   | Dephosphocoenzyme A                                      |
| 312 COA     | Coenzyme A                                               |
| 313 ACP     | Acyl carrier protein                                     |
| 314 bALA    | $\beta$ -Alanine                                         |
| 315 ISUCC   | $\alpha$ -Iminosuccinate                                 |
| 316 QA      | Quinolate                                                |
| 317 NAMN    | Nicotinic acid mononucleotide                            |
| 318 NAAD    | Nicotinic acid adenine dinucleotide                      |
| 319 NAD     | Nicotinamide adenine dinucleotide                        |
| 320 NADP    | Nicotinamide adenine dinucleotide phosphate              |
| 321 NMN     | Nicotinamide mononucleotide                              |
| 322 NAm     | Nicotinamide                                             |
| 323 NAC     | Nicotinic acid                                           |
| 324 GTRNA   | L-Glutamyl-tRNA(glu)                                     |
| 325 GSA     | Glutamate-1-semialdehyde                                 |
| 326 ALAV    | D-Aminolevulinate                                        |
| 327 PBG     | Probilinogen III                                         |
| 328 HMB     | Hydroxymethylbilane                                      |
| 329 UPRG    | Uroporphyrinogen III                                     |
| 330 PC2     | Percorrin 2                                              |
| 331 SHCL    | Sirohydrochlorin                                         |
| 332 SHEME   | Siroheme                                                 |
| 333 CPP     | Coproporphyrinogen III                                   |
| 334 PPHG    | Protoporphyrinogen                                       |
| 335 PPIX    | Protoporphyrin IX                                        |
| 336 PTH     | Protoheme                                                |
| 337 HO      | Heme O                                                   |
| 338 AONA    | 8-Amino-7-oxononanoate                                   |
| 339 DANNA   | 7,8-Diaminononanoate                                     |
| 340 DTB     | Dethiobiotin                                             |
| 341 BT      | Biotin                                                   |
| 342 GC      | L- $\gamma$ -Glutamylcysteine                            |
| 343 RGT     | Reduced glutathione                                      |
| 344 AHM     | 4-Amino-5-hydroxymethyl-2-methylpyrimidine               |
| 345 AHMP    | 4-Amino-5-hydroxymethyl-2-methylpyrimidine-phosphate     |
| 346 AHMPP   | 4-Amino-5-hydroxymethyl-2-methylpyrimidine-pyrophosphate |
| 347 DTP     | 1-Deoxy-d-threo-2-pentulose                              |
| 348 THZ     | 4-Methyl-5-(beta-hydroxyethyl)thiazole                   |
| 349 THZP    | 4-Methyl-5-(beta-hydroxyethyl)thiazole phosphate         |
| 350 THMP    | Thiamine-phosphate                                       |
| 351 THIAMIN | Thiamin                                                  |
| 352 TPP     | Thiamine-pyrophosphate                                   |
| 353 ER4P    | Erythronate-4-phosphate                                  |
| 354 OHB     | 3-Hydroxy-4-phospho-hydroxy-alpha-ketobutyrate           |
| 355 PHT     | Phospho-hydroxy-threonine                                |

|               |                                                                                  |
|---------------|----------------------------------------------------------------------------------|
| 356 P5P       | Pyridoxine-5'-phosphate                                                          |
| 357 PL5P      | Pyridoxal 5'-phosphate                                                           |
| 358 PDLA5P    | Pyridoxamine-5-phosphate                                                         |
| 359 4HLT      | 4-Hydroxy-l-tyrosine                                                             |
| 360 PYRDX     | Pyridoxine                                                                       |
| 361 PL        | Pyridoxal                                                                        |
| 362 PDLA      | Pyridoxamine                                                                     |
| 393 SSALTPP   | Succinate semialdehyde - thiamine pyrophosphate                                  |
| 397 23DHDHB   | 2,3-Dihydro-2,3-dihydroxybenzoate                                                |
| 398 23DHB     | 2,3-Dihydroxybenzoate                                                            |
| 399 23DHBA    | 2,3-Dihydroxybenzoyl-adenylate                                                   |
| 400 SERA      | L-Seryl-adenylate                                                                |
| 401 ENTER     | Enterochelin                                                                     |
| 402 OGT       | Oxidized glutathione                                                             |
| 404 DHPP      | Dihydroneopterin phosphate                                                       |
| 410 HBA       | 4-Hydroxy-benzyl-alcohol                                                         |
| 411 CHCOA     | 6-Carboxyhexanoyl-coa                                                            |
| 414 DX5P      | Deoxyxylulose-5-phosphate                                                        |
| 415 SAMOB     | S-Adenosyl-4-methylthio-2-oxobutanoate                                           |
| 5 T3P2/DHAP   | Dihydroxyacetone phosphate                                                       |
| 6 T3P1        | Glyceraldehyde 3-phosphate                                                       |
| 11 PYR        | Pyruvate                                                                         |
| 12 ACCOA      | Acetyl-CoA                                                                       |
| 75 GL3P       | Glycerol 3-phosphate                                                             |
| 275 MALCOA    | Malonyl-CoA                                                                      |
| 276 MALACP    | Malonyl-ACP                                                                      |
| 277 ACACP     | Acetyl-ACP                                                                       |
| 278 C141ACP   | $\beta$ -Hydroxymyristic acid                                                    |
| 278 C-----ACP | CH <sub>3</sub> -(CH <sub>2</sub> ) <sub>x</sub> -CO-CH <sub>2</sub> -CO-S-ACP   |
| 278 C181ACP   | cis-Vaccenic acid                                                                |
| 278 C140ACP   | Myristic acid                                                                    |
| 278 C160ACP   | Palmitic acid                                                                    |
| 278 C161ACP   | Palmitoleic acid                                                                 |
| 279           | CH <sub>3</sub> -(CH <sub>2</sub> ) <sub>x</sub> -CHOH-CH <sub>2</sub> -CO-S-ACP |
| 280 23DACOA   | 2,3-Dehydroacyl-CoA                                                              |
| 280 OACOA     | 3-Oxoacyl-CoA                                                                    |
| 280 AACCOA    | Acetoacetyl-CoA                                                                  |
| 280 ACOA      | Acyl-CoA                                                                         |
| 280           | CH <sub>3</sub> -(CH <sub>2</sub> ) <sub>x</sub> -CH=CH-CO-S-ACP                 |
| 280 LCCA      | Long-chain carboxylic acid                                                       |
| 280 HACOA     | Hydroxyacyl-CoA                                                                  |
| 281           | CH <sub>3</sub> -(CH <sub>2</sub> ) <sub>x</sub> +2-CO-S-ACP                     |
| 283 AGP       | 1-Acylglycerol 3-phosphate                                                       |
| 284 DGR       | D-1,2-Diacylglycerol                                                             |
| 285 PA        | Phosphatidyl acid                                                                |
| 286 CDPDG     | CDP-1,2-Diacylglycerol                                                           |
| 287 PS        | Phosphatidyl serine                                                              |
| 288 PE        | Phosphatidyl ethanolamine                                                        |
| 289 PGP       | L-1-Phosphatidyl-glycerol-phosphate                                              |
| 290 PG        | Phosphatidyl glycerol                                                            |

|               |                                                                                                                  |
|---------------|------------------------------------------------------------------------------------------------------------------|
| 291 CL        | Cardiolypin                                                                                                      |
| 292 IPPP      | Isopentyl pyrophosphate                                                                                          |
| 293 DMPP      | Dimethylallyl pyrophosphate                                                                                      |
| 294 GPP       | trans Geranyl pyrophosphate                                                                                      |
| 295 FPP       | trans, trans Farnesyl pyrophosphate                                                                              |
| 296 OPP       | trans Octaprenyl pyrophosphate                                                                                   |
| 297 UDPP      | Undecaprenyl pyrophosphate                                                                                       |
| 3 F6P         | Fructose 6-phosphate                                                                                             |
| 10 PEP        | Phosphoenolpyruvate                                                                                              |
| 30 RL5P       | Ribulose 5-phosphate                                                                                             |
| 33 S7P        | sedo-Heptulose                                                                                                   |
| 48 UDPG       | UDP Glucose                                                                                                      |
| 50 G1P        | Glucose 1-phosphate                                                                                              |
| 79 GA6P       | D-Glucosamine                                                                                                    |
| 85 GLU        | Glutamate                                                                                                        |
| 89 DALA       | D-Alanine                                                                                                        |
| 278 C-----ACP | CH <sub>3</sub> -(CH <sub>2</sub> ) <sub>x</sub> -CO-CH <sub>2</sub> -CO-S-ACP                                   |
| 285 PA        | Phosphatidyl acid                                                                                                |
| 363 GA1P      | Glucosamine 1-phosphate                                                                                          |
| 364 UDPNAG    | UDP N-actyl glucosamine                                                                                          |
| 365 UDPG2AA   | UDP-3-O-(3-hydroxytetradecanoyl)-N-acetylglucosamine                                                             |
| 366 UDPG2A    | UDP-3-O-(3-hydroxytetradecanoyl)glucosamine                                                                      |
| 367 UDPG23A   | UDP-2,3-bis(3-hydroxytetradecanoyl)glucosamine                                                                   |
| 368 LIPX      | Lipid X                                                                                                          |
| 369 DISAC1P   | Lipid A disaccharide                                                                                             |
| 370 LIPV      | Lipid IV(A)                                                                                                      |
| 371 KDOLIPV   | (KDO)-lipid IV(A)                                                                                                |
| 372 K2LIPV    | (KDO(2))-lipid IV(A)                                                                                             |
| 373 LIPA      | (KDO(2))-lipid A (Endotoxin)                                                                                     |
| 374 CMPKDO    | CMP-2-keto-3-deoxyoctanoate                                                                                      |
| 375 KDO       | 2-Dehydro-3-deoxy-D-octonate                                                                                     |
| 376 A5P       | D-Arabinose 5-phosphate                                                                                          |
| 377 CDPETN    | CDP-Ethanolamine                                                                                                 |
| 378 ADPHEP    | ADP-Mannoheptose                                                                                                 |
| 379 LPS       | Lippolysaccharide                                                                                                |
| 380 UDPNAGEP  | UDP-N-acetyl-3-O-(1-carboxyvinyl)-D-glucosamine                                                                  |
| 381 UDPNAM    | UDP-N-acetyl-D-muramate                                                                                          |
| 383 DGLU      | D-Glutamate                                                                                                      |
| 384 UDPNAMA   | UDP-N-acetylmuramoyl-L-alanine                                                                                   |
| 385 UDPNAMAG  | UDP-N-acetylmuramoyl-L-alanyl-D-glutamate                                                                        |
| 386 UNAGD     | UDP-N-acetylmuramoyl-L-alanyl-D-glutamyl-meso-2,6-diaminoheptanedioate                                           |
| 387 AA        | D-Alanyl-D-alanine                                                                                               |
| 388 UNAGDA    | UDP-N-acetylmuramoyl-L-alanyl-D-glutamyl-meso-2,6-diaminoheptanedioate- D-alanyl-D-alanine                       |
| 389 PEPTIDO   | Peptidoglycan                                                                                                    |
| 405 KDOP      | 2-Dehydro-3-deoxy-D-octonate 8-phosphate                                                                         |
| 406 UNPTDO    | UDP-N-acetylmuramoyl-L-alanyl-D-glutamyl-meso-2,6-diaminoheptanedioate- D-alanyl-D-alanine-diphosphoundecaprenol |
| NH3           | Ammonia                                                                                                          |

|        |                       |
|--------|-----------------------|
| NA     | Sodium                |
| O2     | Oxygen                |
| PI     | Phosphate (inorganic) |
| PPI    | Pyrophosphate         |
| UREA   | Urea                  |
| OAHSER | O-Acetyl-L-homoserine |
| SLA    | Sialic acid           |
| NAMAN  | N-Acetylneuraminate   |
| FRDX   | Oxidized ferredoxin   |
| FRDXH  | Reduced ferredoxin    |
| MTHGXL | Methylglyoxal         |
